# Supplementary material
Source: PubMed Central journal article supplement (PMC2547129)

## Supporting Information

### Hydrazone and Hydrazone-Containing *N*-Substituted Glycines as Peptoid Surrogates for Expedited Library Synthesis: Application to the Preparation of Tsg101-Directed HIV-1 Budding Antagonists

Fa Liu,<sup>1</sup> Andrew G. Stephen,<sup>2</sup> Catherine Adamson,<sup>3</sup> Karine Gousset,<sup>3</sup> M. Javad Aman,<sup>4</sup> Eric O. Freed,<sup>3</sup> Robert J. Fisher,<sup>2</sup> Terrence R. Burke, Jr.<sup>1\*</sup>

<sup>1</sup>Laboratory of Medicinal Chemistry, CCR, NCI-Frederick, NIH, Bldg. 376 Boyles St., Frederick, MD 21702 and <sup>2</sup>Protein Chemistry Laboratory, SAIC-Frederick, Inc. and <sup>3</sup>HIV Drug Resistance Program, CCR, NCI-Frederick and <sup>4</sup>U.S. Army Medical Research Institute for Infectious Diseases, Frederick, MD

#### Human Tsg101 UEV Domain *E.coli* Expression and Purification

The human Tsg101 UEV domain with a C-terminal His-Tag (hTsg101-UEV-His) was expressed in *E.coli* using the pET expression system and host strain BL21(DE3)pLysS (Novagen). Briefly, hTsg101-UEV was PCR amplified using the following primers; 5'-GGCCATGGCGGTGTCGGAGAGCCAGC-3' and 5'-CCTCGAGAGGACGAGAGAA GACTGG-3' and cloned into pET21b (Novagen), placing hTsg101-UEV in-frame with a C-terminal His-Tag. Protein expression was induced at O.D<sub>600</sub> 0.4-0.6 with 1 mM IPTG (Novagen) for 3 hours at 37° C. The resultant bacterial pellet was sonicated in 1 x phosphate buffer containing 20mM Imidazole and Benzoase nuclease (Novagen). The hTsg101-UEV-His protein was purified to approximately 90% purity using the HisTrap HP kit (Amersham Biosciences) (Figure 1). The manufacture's protocol was optimized with a pre-elution wash using 1 x phosphate buffer containing 80 mM imidazole and elution performed with 1 x phosphate buffer containing 300 mM Imidazole. Buffer exchange into PBS and protein concentration was performed using vivaspin 20, 5000 MWCO columns (Vivascience). The purified protein was verified by SDS-PAGE stained with GelCode Blue (Pierce; Figure 1) and protein concentration estimated with the Quick start Bradford protein assay (Bio-Rad).

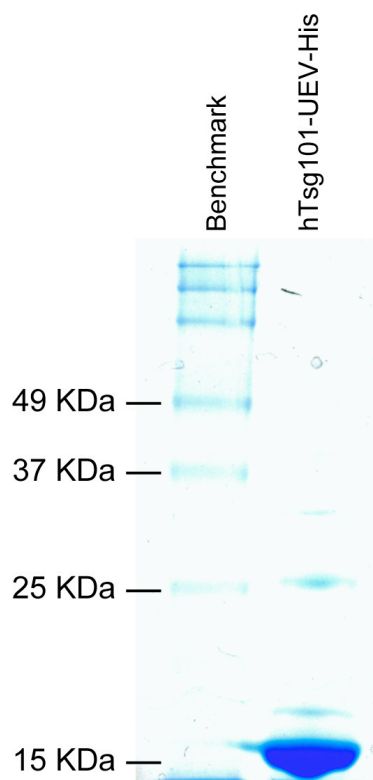

**Figure 1.** The human Tsg101-UEV domain with a C-terminal His-Tag was expressed in *E.coli* using the pET expression system and host strain BL21(DE3)pLysS (Novagen). Protein purification was performed using the His-tagged HP kit (Amersham Biosciences). The purified and concentrated protein was verified by SDS-PAGE stained with GelCode blue (Pierce).

### Fluorescence Anisotropy Assays

Fluorescence anisotropy is based on the observation that when a fluorescent molecule is excited with plane-polarized light, it emits polarized fluorescent light into a fixed plane if the molecules are stationary between excitation and emission.<sup>1</sup> Because molecules are not stationary but tumble and rotate the fluorescence anisotropy of the molecule is proportional to the molecule's molecular volume (if viscosity and temperature are constant). Smaller molecules rotate fast but when they interact with large molecules and their rotation is slowed and the anisotropy of the smaller molecule is increased. This phenomenon can be used to study molecular interactions. The fluorescence anisotropy is a measure of the ratio of the emission intensities from the parallel and perpendicular planes.

Equilibrium binding isotherms for TSG101 binding to peptoids were monitored by fluorescence anisotropy using methods developed previously.<sup>2</sup> Serial dilutions of TSG101 protein were mixed in 96-well Costar polypropylene plates (Corning, NY) with 20 – 50 nM peptoids labeled at the N-terminus with fluorescein in 20 mM HEPES, 150 mM NaCl, pH 7.5, 5 mM  $\beta$ -mercaptoethanol, 100  $\mu$ M TCEP. After 10min incubation, 2

aliquots of 50  $\mu\text{L}$  were removed and transferred into 384-well Costar polypropylene plates (Corning, NY) and read using a Tecan Ultra plate reader (Durham, NC) with excitation and emission wavelengths at 485 nm and 535 nm, respectively. Curves were fit assuming a single binding site per oligonucleotide, using the relation:

$$An(C) = \frac{\left( (R \cdot An_{bound} - An_{free}) \cdot \left( \left\{ K_d + C + Lt \right\} - \left[ (K_d + C + Lt)^2 - 4 \cdot Lt \cdot C \right]^{1/2} \right) \sqrt{2Lt} \right) + An_{free}}{\left( (R - 1) \cdot \left( \left\{ K_d + C + Lt \right\} - \left[ (K_d + C + Lt)^2 - 4Lt \cdot C \right]^{1/2} \right) \sqrt{2Lt} \right) + 1} \quad (1)$$

where  $An(C)$  is the measured anisotropy as a function of concentration,  $Lt$  is the oligonucleotide concentration,  $An_{free}$  is the anisotropy of unbound peptoid,  $An_{bound}$  is the anisotropy of the bound peptoid solution,  $R$  is the ratio of the fluorescence intensity of bound peptoid relative to free peptoid,  $C$  is the protein concentration, and  $K_d$  is the measured dissociation constant resulting from the fit.<sup>1</sup> A plot of binding data is shown in Figures 2 and 3.

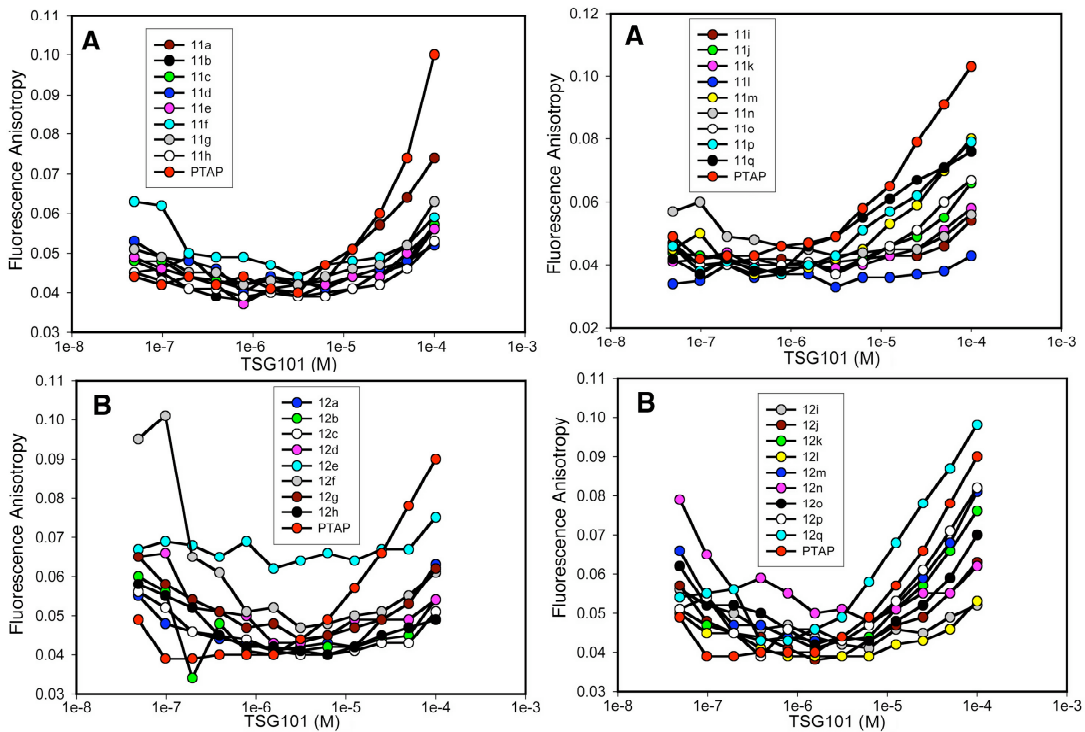

**Figure 2.** Results of FA assays measuring the binding of peptide analogues to Tsg101 protein: (A) Peptoid hydrazones; (B) Peptoid hydrazides.

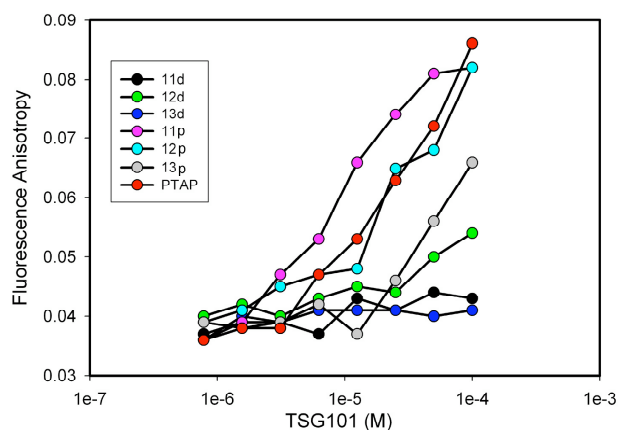

**Figure 3.** Results of FA assays measuring the binding of peptide analogues to Tsg101 protein.

### Synthetic Experimental

**Bromoacetic acid 2-propenyl ester (6).** To a solution of allyl alcohol (20.5 mL, 0.30 mol), triethylamine (46 mL, 0.33 mol) and 4-dimethylaminopyridine (1.83 g, 1.50 mmol) in dichloromethane (600 mL) at 0° C, was added bromoacetyl bromide (26.0 mL, 0.30 mol) dropwise then the reaction mixture was warmed to room temperature, and stirred overnight. The solution was washed with H<sub>2</sub>O (2 x 150 mL) and brine (150 mL), dried (Na<sub>2</sub>SO<sub>4</sub>) and solvent was removed under vacuum. Distillation (80° C at 3.5 Torr) afforded known **6**<sup>3</sup> as a colorless oil (27.2 g, 51% yield). <sup>1</sup>H NMR (400 MHz, CDCl<sub>3</sub>) δ 5.92 (m, 1 H), 5.35 (m, 2 H), 4.67 (m, 2 H), 3.87 (s, 2 H).

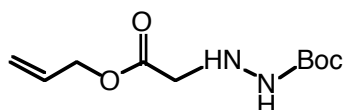

C<sub>10</sub>H<sub>18</sub>N<sub>2</sub>O<sub>4</sub>  
Exact Mass: 230.13  
Mol. Wt.: 230.26

**2-[(2'-Propenyloxy)-2-oxoethyl]hydrazinecarboxylic acid 1,1-dimethylethyl ester (7).** A mixture of ester **6** (25.0 g, 0.140 mol) and *tert*-butyl carbazate (17.5 g, 0.126 mol) in *N,N*-diisopropylethylamine (150 mL) was stirred at room temperature (48 h). Solvent was removed under vacuum, the residue was dissolved in ethyl acetate (200 mL), washed with H<sub>2</sub>O (2 x 100 mL) and brine (50 mL), dried (Na<sub>2</sub>SO<sub>4</sub>) and solvent was removed under vacuum. Purification by silical flash chromatography (hexane and ethyl acetate) afforded **7** as a viscous colorless oil (21.0 g, 73% yield). <sup>1</sup>H NMR (400 MHz, CDCl<sub>3</sub>) δ 6.40 (brs, 1 H), 5.92 (m, 1 H), 5.32 (m, 2 H), 4.65 (m, 2 H), 3.70 (s, 2 H), 1.45 (s, 9H). FAB-MS (+VE) *m/z*: 231.1 (M + H)<sup>+</sup>. HR-MS (NH<sub>3</sub>/Cl) (M + H)<sup>+</sup>: 231.1355, Calc: 231.1350.

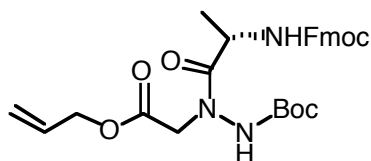

C<sub>28</sub>H<sub>33</sub>N<sub>3</sub>O<sub>7</sub>  
 Exact Mass: 523.23  
 Mol. Wt.: 523.58

**2-[(1,1-Dimethylethoxy)carbonyl]-1-[2-(2'-propenyloxy)-2-oxo-1-ethyl]hydrazide-*N*-[(9H-fluorenyl-9-ylmethoxy)carbonyl]-L-alanine (8).** To a solution of *N*-Fmoc-L-Ala-OH (5.42 g, 17.4 mmol) in *N,N*-dimethylformamide (30 mL) at 0° C was added 4-methylmorpholine (2.40 mL, 21.7 mmol) followed by isobutyl chloroformate (2.50 mL, 19.1 mmol) and the reaction mixture was stirred at 0° C (10 minutes). A solution of **7** (2.00 g, 8.70 mmol) in *N,N*-dimethylformamide (10 mL) was added then the reaction mixture was warmed to room temperature and stirred overnight. The reaction mixture was diluted by ethyl acetate (200 mL), washed with H<sub>2</sub>O (3 x 50 mL) and brine, dried (Na<sub>2</sub>SO<sub>4</sub>) and solvent was removed under vacuum. Purification by silical flash chromatography (hexane and ethyl acetate) afforded **8** as a colorless oil (3.60 g, 79% yield). <sup>1</sup>H NMR (400 MHz, DMSO-d<sub>6</sub>) δ 9.80 (brs, 1 H), 7.84 (d, J = 7.2 Hz, 2 H), 7.70 (t, J = 7.4 Hz, 2 H), 7.45 (d, J = 8.4 Hz, 1 H), 7.64 (m, 2 H), 7.28 (t, J = 7.6 Hz, 2 H), 5.85 (m, 1 H), 5.25 (d, J = 15.6 Hz, 1 H), 5.15 (d, J = 10.4 Hz, 1 H), 4.70 – 4.40 (brs, 3 H, rotamers), 4.40 – 3.50 (brs, 5 H, rotamers), 1.50 – 1.30 (m, 9 H), 1.20 (m, 3 H). <sup>13</sup>C NMR (400 MHz, DMSO-d<sub>6</sub>) δ 175.2, 170.6, 169.5, 169.3, 168.1, 155.8, 144.4, 144.2, 141.1, 132.9, 132.6, 128.0, 127.5, 125.7, 120.5, 118.2, 81.0, 79.0, 66.1, 65.4, 64.9, 47.1, 46.9, 28.5, 28.3. FAB-MS (+VE) m/z: 524.2 (M + H)<sup>+</sup>. HR-FAB (M + Na)<sup>+</sup>: 546.2255, Calc: 546.2236.

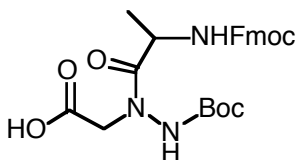

C<sub>25</sub>H<sub>29</sub>N<sub>3</sub>O<sub>7</sub>  
 Exact Mass: 483.20  
 Mol. Wt.: 483.51

**2-[(1,1-Dimethylethoxy)carbonyl]-1-[2-carboxy-1-ethyl]hydrazide-*N*-[(9H-fluorenyl-9-ylmethoxy)carbonyl]-L-alanine (9).** A solution of dipeptide **8** (3.60 g, 6.88 mmol) in anhydrous tetrahydrofuran (120 mL) was degassed under argon for 5 minutes, then morpholine (3.10 mL, 34.3 mmol) and tetrakis(triphenylphosphine)palladium (0)

(824 mg, 0.71 mmol) was added and the mixture was stirred at room temperature (30 minutes). The reaction mixture was acidified with aqueous HCl (0.10 N, 50 mL) then tetrahydrofuran was removed under vacuum. The residue was extracted with ethyl acetate (2 x 100 mL), washed with aqueous HCl (0.10 N, 2 x 50 mL), brine (50 mL) and purified by silical gel flash chromatography (dichloromethane and methanol) to afford a viscous yellow oil. This was dissolved in 50% aqueous acetonitrile (50 mL) and lyophilized to provided **9** as a pale yellow powder in (3.00 g, 90% yield).  $^1\text{H}$  NMR (400 MHz, DMSO- $d_6$ )  $\delta$  9.70 (brs, 1 H), 7.83 (d,  $J = 7.6$  Hz, 2 H), 7.69 (t,  $J = 8.0$  Hz, 2 H), 7.60 – 7.35 (m, 3 H), 7.28 (dt,  $J = 7.6, 1.2$  Hz, 2 H), 4.70 – 4.40 (brs, 2 H, rotamers), 4.25 – 4.15 (m, 3 H), 4.00 – 3.40 (m, 1 H, rotamers), 1.50 – 1.30 (m, 9 H), 1.18 (m, 3 H).  $^{13}\text{C}$  NMR (400 MHz, DMSO- $d_6$ )  $\delta$  175.0, 170.3, 155.8, 155.0, 144.4, 144.2, 141.1, 133.5, 132.5, 132.0, 129.2, 129.1, 128.1, 127.5, 125.8, 120.5, 81.0, 66.2, 50.5, 47.1, 46.8, 28.3. FAB-MS (-VE)  $m/z$ : 482.1 (M - H) $^-$ . HR-FAB (M + Na) $^+$ : 506.1907, Calc: 506.1905.

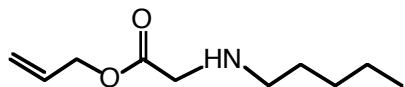

$\text{C}_{10}\text{H}_{19}\text{NO}_2$   
Exact Mass: 185.14  
Mol. Wt.: 185.26

**Pentylamine-acetic acid allyl ester (14a).** To a solution of Bromoacetic acid 2-propenyl ester **6** (2.0 g, 11.2 mmol) in dichloromethane (50 mL), was added triethylamine (3.2 mL, 22.4 mmol) and pentylamine (1.94 mL, 16.8 mmol). The mixture was stirred overnight and diluted by ethyl acetate (150 mL), washed by H<sub>2</sub>O (50 mL x 2) and brine (50 mL), dried over sodium sulfate and purified by silical gel column (hexane and ethyl acetate) to afford 1.40 g pale yellow oil in 63% yield.  $^1\text{H}$  NMR (400 MHz, CDCl<sub>3</sub>)  $\delta$  5.94 (m, 1 H), 5.30 (m, 2 H), 4.63 (dt,  $J = 5.6, 1.2$  Hz, 2 H), 3.44 (s, 2 H), 2.60 (t,  $J = 7.2$  Hz, 2 H), 1.65 (brs, 1 H), 1.50 (m, 2 H), 1.34 – 1.29 (m, 4 H), 0.90 (m, 3 H).  $^{13}\text{C}$  NMR (400 MHz, DMSO- $d_6$ )  $\delta$  172.3, 133.0, 118.0, 64.7, 50.7, 49.1, 29.6, 29.4, 22.5, 14.3. FAB-MS (+VE)  $m/z$ : 186.2 (M + H) $^+$ . HR-MS (NH<sub>3</sub>/Cl) (M + H) $^+$ : 186.1482, Calc: 186.1488.

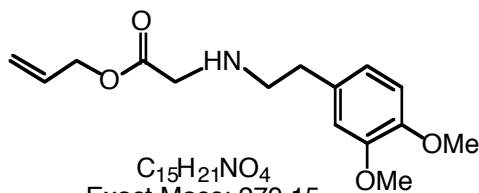

$\text{C}_{15}\text{H}_{21}\text{NO}_4$   
Exact Mass: 279.15  
Mol. Wt.: 279.33

**(3,4-Dimethoxy-phenethylamino)-acetic acid allyl ester (14b).** Nucleophilic replacement of **6** to **14b** as reported above for conversion **6** to **14a** yielded the XX in 86% yield as a pale yellow oil.  $^1\text{H}$  NMR (400 MHz, CDCl<sub>3</sub>)  $\delta$  6.82 – 6.75 (m, 3 H), 5.90 (m, 1 H), 5.26 (m, 2 H), 4.62 (dt,  $J = 5.6, 1.2$  Hz, 2 H), 3.88 (s, 3 H), 3.86 (s, 3 H), 3.46 (s, 2

H), 2.88 (m, 2 H), 2.77 (t,  $J = 7.0$  Hz, 2 H), 1.80 (brs, 1 H).  $^{13}\text{C}$  NMR (400 MHz, DMSO- $d_6$ )  $\delta$  172.3, 149.1, 147.5, 133.1, 120.8, 118.1, 112.9, 112.3, 64.8, 55.9, 55.7, 50.7, 50.5, 35.8. FAB-MS (+VE)  $m/z$ : 280.3 ( $M + H$ ) $^+$ . HR-MS ( $\text{NH}_3/\text{Cl}$ ) ( $M + H$ ) $^+$ : 280.1555, Calc: 280.1552.

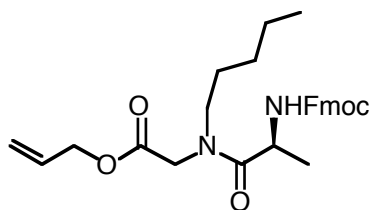

$\text{C}_{28}\text{H}_{34}\text{N}_2\text{O}_5$   
Exact Mass: 478.25  
Mol. Wt.: 478.58

***N*-[(9H-fluorenyl-9-ylmethoxy)carbonyl]-L-alanine-N-pentyl-glycine allyl ester (15a).** Coupling **14a** with Fmoc-Ala-OH as reported above for conversion **7** to **8** yielded the product in 42% yield as a white wax.  $^1\text{H}$  NMR (400 MHz, DMSO- $d_6$ )  $\delta$  7.83 (d,  $J = 7.6$  Hz, 2 H), 7.70 – 7.60 (m, 3 H), 7.36 (t,  $J = 7.6$  Hz, 2 H), 7.27 (t,  $J = 7.6$  Hz, 2 H), 5.84 (m, 1 H), 5.23 (dt,  $J = 17.2, 1.6$  Hz, 1 H), 5.16 (m, 1 H), 4.55 – 4.45 (m, 3 H, rotamers), 4.30 – 4.10 (m, 4.2 H, rotamers), 3.85 (AB,  $J_{\text{AB}} = 17.2$  Hz, 0.8 Hz), 3.35 – 3.20 (m, 2 H), 1.53 (m, 1.3 H, rotamers), 1.35 (m, 0.7 H, rotamers), 1.25 – 1.05 (m, 7 H), 1.05 – 0.80 (m, 3 H).  $^{13}\text{C}$  NMR (400 MHz, DMSO- $d_6$ )  $\delta$  173.2, 173.0, 170.0, 169.3, 156.0, 144.2, 141.1, 132.8, 128.0, 127.4, 125.7, 120.5, 118.1, 66.2, 65.1, 48.7, 48.2, 47.1, 46.6, 28.8, 28.6, 22.3, 18.2, 14.3. FAB-MS (+VE)  $m/z$ : 479.5 ( $M + H$ ) $^+$ . HR-FAB ( $M + \text{Na}$ ) $^+$ : 501.2411, Calc: 501.2388.

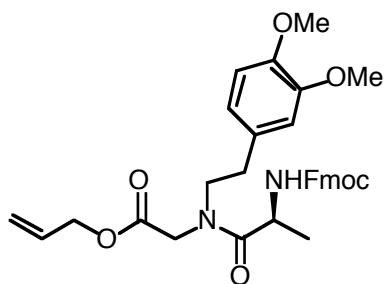

$\text{C}_{33}\text{H}_{36}\text{N}_2\text{O}_7$   
Exact Mass: 572.25  
Mol. Wt.: 572.65

***N*-[(9H-fluorenyl-9-ylmethoxy)carbonyl]-L-alanine-N-(3,4-Dimethoxyphenethyl)-glycine allyl ester (15b).** Coupling **14b** with Fmoc-Ala-OH as reported above for conversion **7** to **8** yielded the product in quantitative yield as a white wax.  $^1\text{H}$  NMR (400 MHz,  $\text{CDCl}_3$ )  $\delta$  7.75 (d,  $J = 7.6$  Hz, 2 H), 7.59 (d,  $J = 7.6$  Hz, 2 H), 7.38 (m, 2 H), 7.29 (m, 2 H), 6.80 – 6.69 (m, 3 H), 5.95 – 5.85 (m, 2 H), 5.26 (m, 2 H), 4.67 – 4.60 (m, 3 H), 4.40 – 4.30 (m, 3 H), 4.20 (m, 1 H), 3.85 (s, 3 H), 3.81 (s, 3 H), 3.73 – 3.52 (m, 3 H), 2.88 (t,  $J = 4.8$  Hz, 1.3 H, rotamers), 2.80 (t,  $J = 4.8$  Hz, 0.7 H, rotamers), 1.46 (d,  $J$

= 6.8 Hz, 0.5 H, rotamers, 1.33 (d,  $J = 6.8$  Hz, 2.5 H). FAB-MS (+VE)  $m/z$ : 573.3 (M + H)<sup>+</sup>. HR-FAB (M + Na)<sup>+</sup>: 595.2474, Calc: 595.2447.

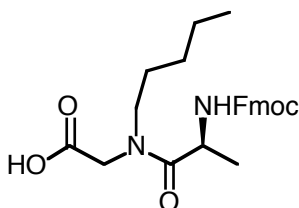

$C_{25}H_{30}N_2O_5$   
Exact Mass: 438.22  
Mol. Wt.: 438.52

**N-[(9H-fluorenyl-9-ylmethoxy)carbonyl]-L-alanine-N-pentyl-glycine (16a).**

Deprotection of **15a** as reported above for conversion **8** to **9** yielded the product in 82% yield as a pale yellow powder. <sup>1</sup>H NMR (400 MHz, DMSO-d<sub>6</sub>)  $\delta$  7.83 (d,  $J = 7.6$  Hz, 2 H), 7.69 (m, 2 H), 7.59 (m, 1 H), 7.36 (t,  $J = 7.2$  Hz, 2 H), 7.28 (t,  $J = 7.6$  Hz, 2 H), 4.48 – 4.36 (m, 1 H, rotamers), 4.25 – 4.13 (m, 3.3 H, rotamers), 4.08 – 3.94 (m, 1 H, rotamers), 3.69 (AB,  $J_{AB} = 17.2$  Hz, 0.7 H, rotamers), 3.35 – 3.10 (m, 2 H), 1.52 (m, 1.2 H, rotamers), 1.36 (m, 0.8 Hz, rotamers), 1.25 – 1.05 (m, 7 H), 0.79 (m, 3 H). <sup>13</sup>C NMR (400 MHz, DMSO-d<sub>6</sub>)  $\delta$  172.9, 171.7, 171.0, 156.0, 144.2, 141.1, 133.6, 132.5, 131.9, 129.1, 128.0, 127.5, 125.7, 120.4, 66.2, 48.5, 48.0, 47.2, 46.6, 28.8, 28.4, 22.3, 18.2, 14.3. FAB-MS (-VE)  $m/z$ : 437.1 (M - H)<sup>-</sup>. HR-FAB (M + Na)<sup>+</sup>: 461.2029, Calc: 461.2041.

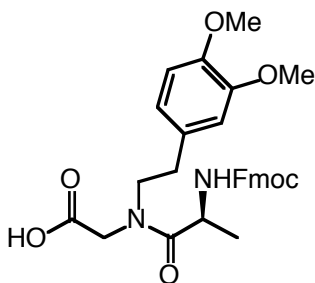

$C_{30}H_{32}N_2O_7$   
Exact Mass: 532.22  
Mol. Wt.: 532.58

**N-[(9H-fluorenyl-9-ylmethoxy)carbonyl]-L-alanine-N-(3,4-Dimethoxyphenethyl)-glycine (16b).** Deprotection of **15b** as reported above for conversion **8** to **9** yielded the product in 86% yield as a pale yellow powder. <sup>1</sup>H NMR (400 MHz, DMSO-d<sub>6</sub>)  $\delta$  7.84 (d,  $J = 7.2$  Hz, 2 H), 7.70 – 7.62 (m, 3 H), 7.36 (t,  $J = 7.6$  Hz, 2 H), 7.28 (m, 2 H), 6.87 – 6.65 (m, 3 H), 4.46 (m, 1 H), 4.32 – 4.13 (m, 4 H, rotamers), 4.04 – 3.85 (m, 1 H, rotamers), 3.67 – 3.63 (m, 6 H), 3.47 (m, 1.6 H, rotamers), 3.32 (m, 0.4 H, rotamers),



2.78 (m, 1.4 H, rotamers), 2.59 (m, 0.6 H, rotamers), 1.10 (d,  $J = 6.8$  Hz, 3 H).  $^{13}\text{C}$  NMR (400 MHz, DMSO- $d_6$ )  $\delta$  174.9, 173.0, 171.7, 171.1, 156.1, 149.4, 147.8, 144.3, 141.1, 133.6, 132.5, 132.0, 131.4, 129.2, 128.1, 127.5, 125.7, 121.2, 120.5, 113.2, 113.0, 112.2, 66.2, 55.8, 50.5, 50.0, 48.5, 47.0, 46.6, 35.0, 18.2. FAB-MS (-VE)  $m/z$ : 531.3 (M - H) $^-$ . HR-FAB (M + H) $^+$ : 533.2302, Calc:533.2295.

**General procedure for solid-phase peptide synthesis.** Peptides and peptoids were synthesized on NovaSyn<sup>®</sup>TGR resin (purchased from Novabiochem, cat. no. 01-64-0060) using standard Fmoc solid-phase protocols using active ester coupling (1-hydroxybenzotriazole (HOBT) and *N,N'*-diisopropylcarbodiimide (DIC) as coupling reagents, once, 2 hours) for primary amines and bromo-tris-pyrrolidino-phosphonium hexafluorophosphate (PyBroP) (double coupling, 2 hours each) for the secondary amines. All peptides and peptoids were tagged with FITC for fluorescence anisotropy assays by reacting with 5 equivalents of fluorescein isothiocyanate in the presence of 5 equivalents of *N,N*-diisopropylethylamine in *N,N*-dimethylformamide (overnight). The final resin was washed with *N,N*-dimethylformamide, methanol, dichloromethane and ether then dried under vacuum (overnight). Peptides and peptoids were cleaved from resin (200 mg) by treatment with 5 mL of trifluoroacetic acid : triisbutylsilane : H<sub>2</sub>O (90 : 5 : 5) (4 h). The resin was filtered off and the filtrate was concentrated under vacuum, then precipitated with ether and the precipitate washed with ether. The resulting solid was dissolved in 50% aqueous acetonitrile (5 mL) and purified by reverse phase preparative HPLC using a Phenomenex C<sub>18</sub> column (21 mm dia x 250 mm, cat. no: 00G-4436-P0) with a linear gradient from 0% aqueous acetonitrile (0.1% trifluoroacetic acid) to 50% acetonitrile (0.1% trifluoroacetic acid) over 35 minutes at a flow rate of 10.0 mL/minute (detection at 254 nm). Lyophilization provided products as yellow powders.

**Synthesis of peptide hydrazones 11a – 11r.** To a solution of unsubstituted peptide hydrazide **10** (1.0 mg, 0.00070 mmol) in 50% aqueous acetonitrile (0.5 mL) was added the appropriate aldehyde (10 equivalents) and the mixture was gently agitated at room temperature (overnight). The product mixture was subjected directly to purification by reverse phase preparative HPLC using a VYDAC Protein and Peptide C<sub>18</sub> column (10 mm dia x 250 mm; catalog no. 218TP510) with a linear gradient of from 0% aqueous acetonitrile (0.1% trifluoroacetic acid) to 50% acetonitrile (0.1% trifluoroacetic acid) over 20 minutes at a flow rate of 8.0 mL/minute (detection at 254 nm). Lyophilization provided the peptoid hydrazones **11a – 11q** as yellow powders (mass spectral data, Table S1).

**Reduction of peptoid hydrazones to yield *N*-substituted peptoid hydrazides 12a – 12r.** Samples of peptide hydrazones **11a – 11r** (~ 0.50 mg, 0.00035 mmol) were dissolved in aqueous acetonitrile (0.5 mL) containing 0.1% trifluoroacetic acid and 20 equivalents of sodium cyanoborohydride (NaBH<sub>3</sub>CN, 1 M, in H<sub>2</sub>O, 8  $\mu$ L) was added and the mixtures were agitated at room temperature (overnight). Purification by preparative HPLC was as indicated above for peptoid hydrazones (mass spectral data, Table S1).

## References

- (1) Lakowicz, J. R. *Principles of Fluorescence Spectroscopy*; Second Edition ed.; Plenum Publishers, 1999.
- (2) Fisher, R. J.; Fivash, M. J.; Stephen, A. G.; Hagan, N. A.; Shenoy, S. R.; Medaglia, M. V.; Smith, L. R.; Worthy, K. M.; Simpson, J. T.; Shoemaker, R.; McNitt, K. L.; Johnson, D. G.; Hixson, C. V.; Gorelick, R. J.; Fabris, D.; Henderson, L. E.; Rein, A. *Nucleic Acids Res.* **2006**, *34*, 472-484.
- (3) Toke, L.; Jaszay, Z. M.; Petnehazy, I.; Clementis, G.; Vereczkey, G. D.; Kovesdi, I.; Rockenbauer, A.; Kovats, K. *Tetrahedron* **1995**, *51*, 9167-78

**Table S1. Mass spectral data for peptoid hydrazones and N-substituted peptoid hydrazides.**

| R                                                                                   | number     | M.W.<br>(theoretical) | M.W.<br>(observed) <sup>a</sup> | number     | M.W.<br>(theoretical) | M.W.<br>(observed)   |
|-------------------------------------------------------------------------------------|------------|-----------------------|---------------------------------|------------|-----------------------|----------------------|
| 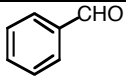   | <b>11a</b> | 1529.58               | 1530.79                         | <b>12a</b> | 1531.60               | 1533.51              |
|    | <b>11b</b> | 1574.57               | 1575.30                         | <b>12b</b> | 1576.58               | 1545.90 <sup>b</sup> |
|    | <b>11c</b> | 1574.57               | 1575.54                         | <b>12c</b> | 1576.58               | 1546.25 <sup>b</sup> |
|    | <b>11d</b> | 1589.60               | 1590.80                         | <b>12d</b> | 1591.62               | 1592.90              |
|    | <b>11e</b> | 1561.57               | 1562.48                         | <b>12e</b> | 1563.59               | 1564.96              |
|    | <b>11f</b> | 1597.57               | 1598.88                         | <b>12f</b> | 1599.58               | 1601.05              |
|   | <b>11g</b> | 1547.57               | 1570.17 <sup>c</sup>            | <b>12g</b> | 1549.59               | 1550.27              |
|  | <b>11h</b> | 1572.62               | 1573.88                         | <b>12h</b> | 1574.64               | 1599.12 <sup>c</sup> |
|  | <b>11i</b> | 1532.59               | 1533.66                         | <b>12i</b> | 1534.61               | 1535.07              |
|  | <b>11j</b> | 1519.56               | 1520.78                         | <b>12j</b> | 1521.58               | 1523.39              |
|  | <b>11k</b> | 1519.56               | 1520.37                         | <b>12k</b> | 1521.58               | 1522.28              |
|  | <b>11l</b> | 1523.59               | 1524.40                         | <b>12l</b> | 1525.61               | 1548.22 <sup>c</sup> |
|  | <b>11m</b> | 1521.61               | 1522.24                         | <b>12m</b> | 1523.63               | 1524.20              |
|  | <b>11n</b> | 1557.61               | 1558.34                         | <b>12n</b> | 1559.63               | 1583.70 <sup>c</sup> |
|  | <b>11o</b> | 1509.61               | 1510.52                         | <b>12o</b> | 1511.63               | 1512.09              |
|  | <b>11p</b> | 1495.60               | 1496.57                         | <b>12p</b> | 1497.61               | 1598.29              |
|  | <b>11q</b> | 1527.57               | 1528.74                         | <b>12q</b> | 1529.58               | 1530.51              |

<sup>a</sup>Observed mass obtained by MALDI-TOF operating in linear mode using  $\alpha$ -cyano-4-hydroxy-cinnamic acid as matrix; <sup>b</sup>The NO<sub>2</sub> group was reduced to NH<sub>2</sub>; <sup>c</sup>(M + Na)<sup>+</sup> peak.

# NMR Spectra

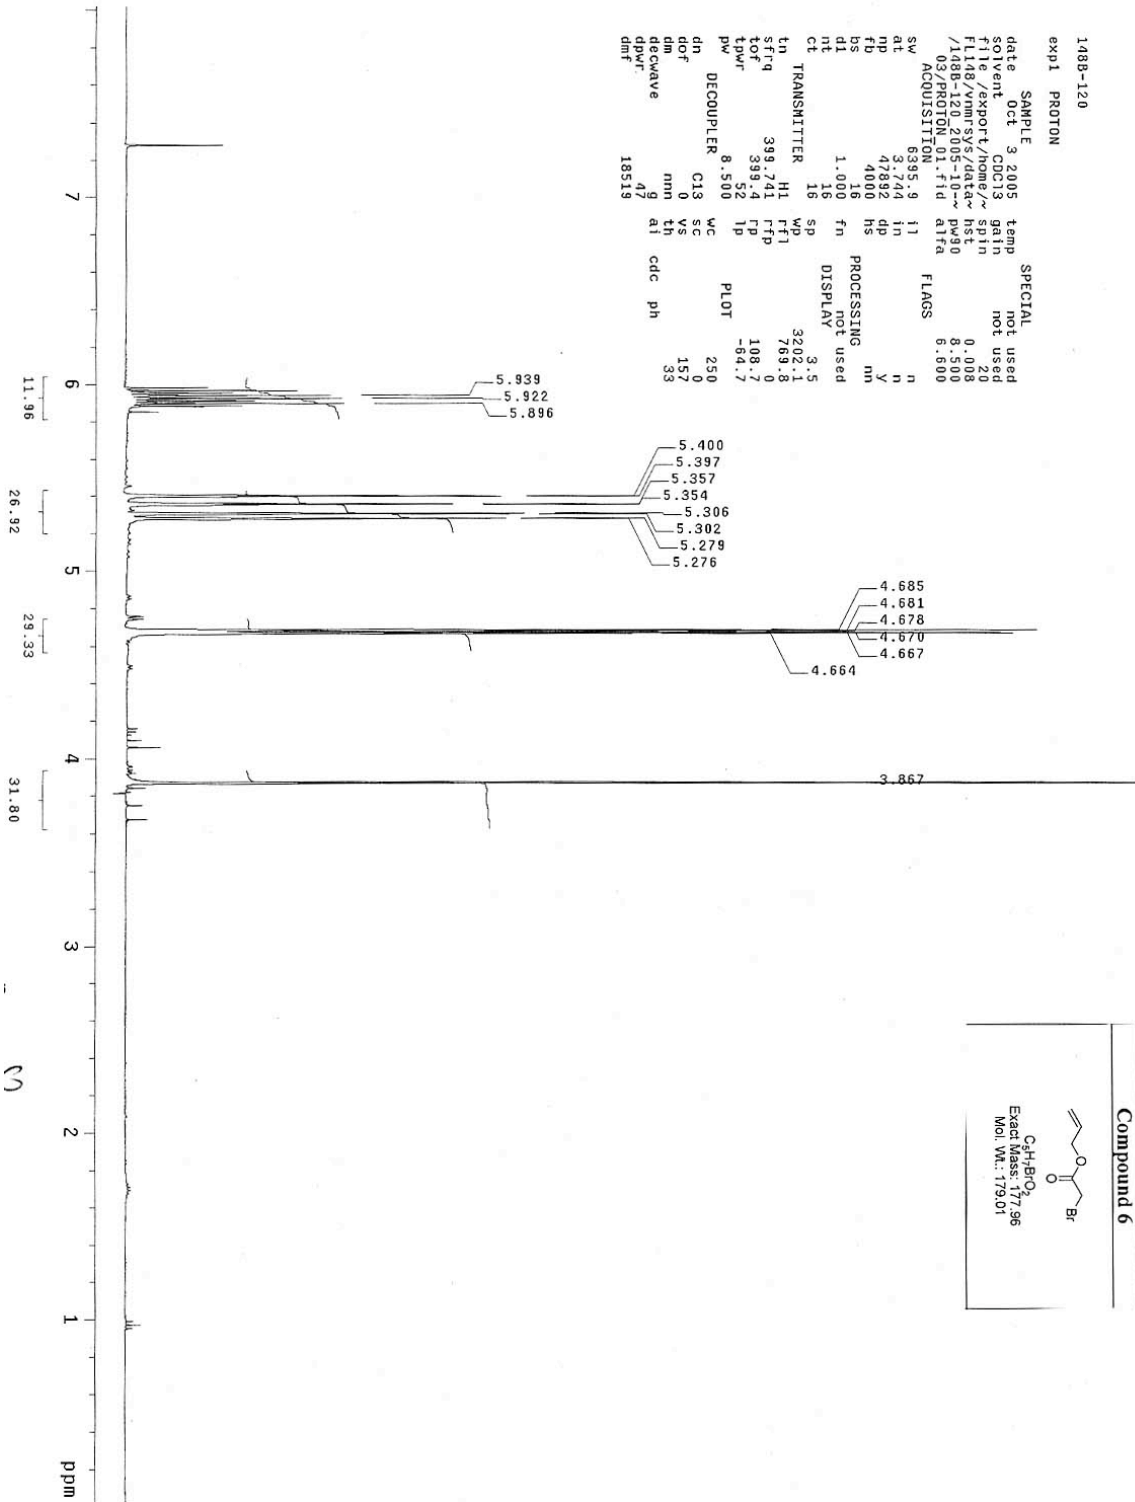

1485-120-125

Data Collected on:  
JetSet-1nov4100  
Acquire directory:  
Sample directory:  
File: PROTON\_01  
Pulse Sequence: szpu1  
Solvent: CDCl3

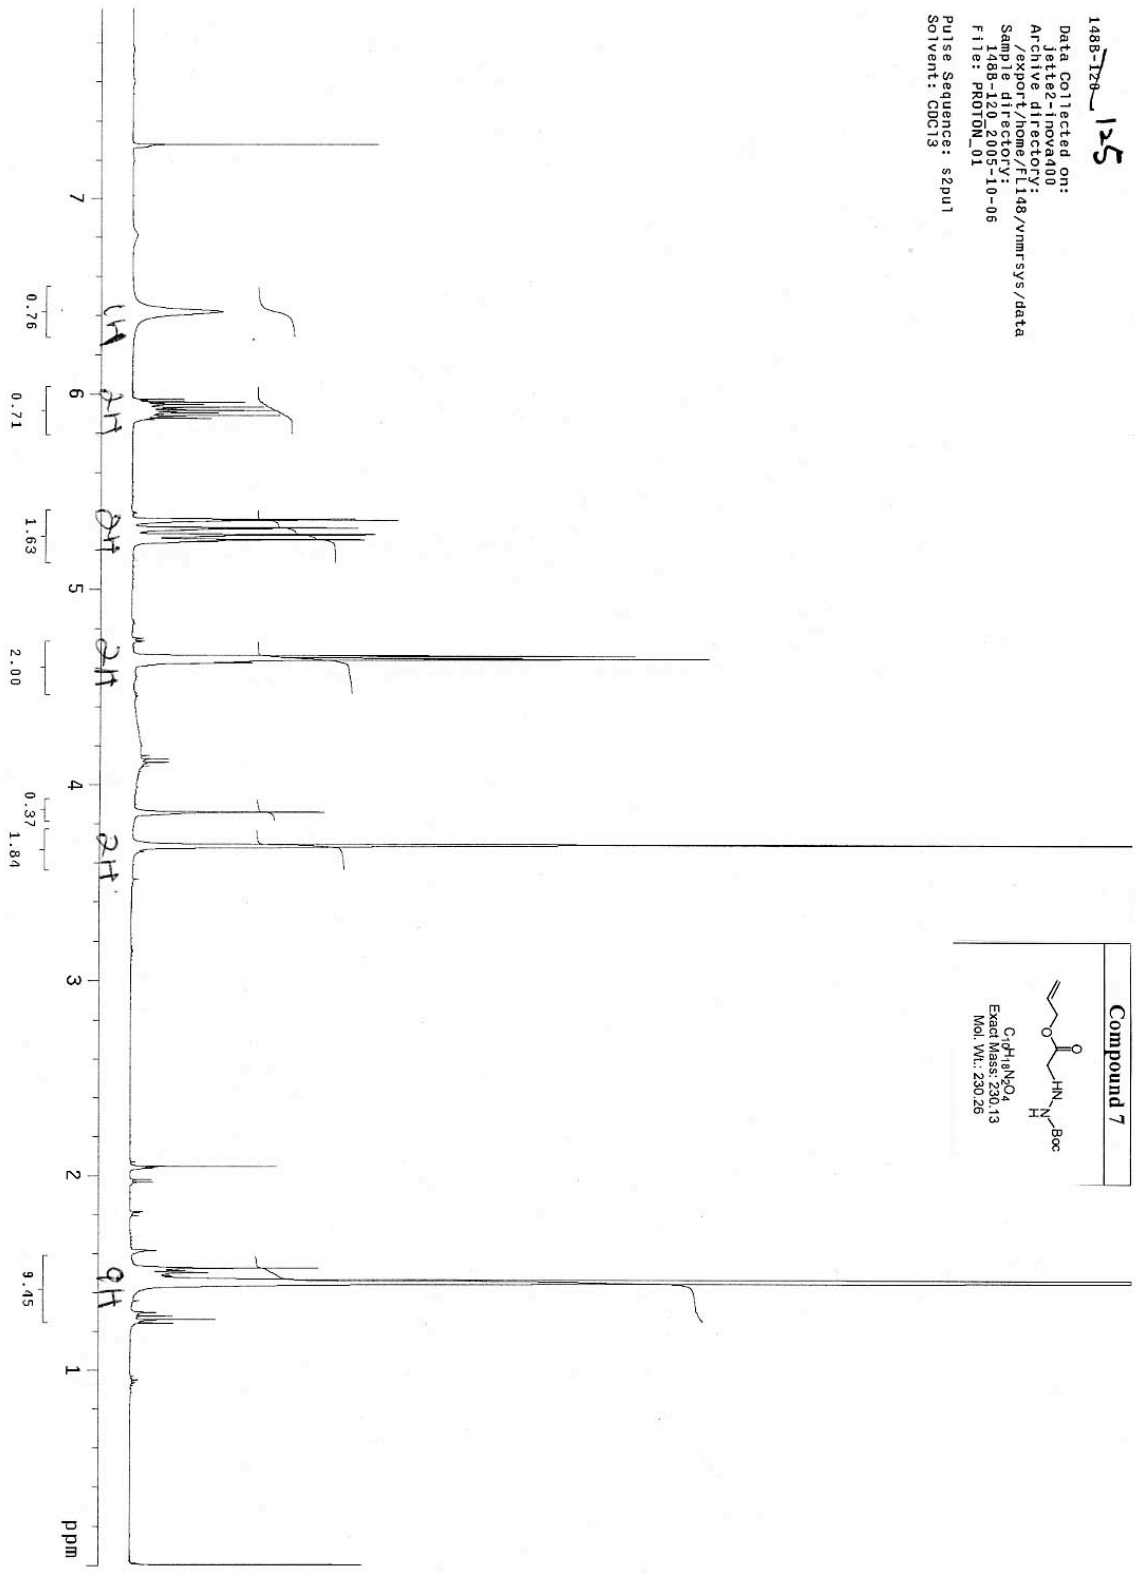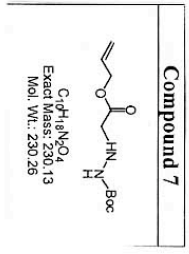

1488-135  
 Data Collected on:  
 Jetted-innovad00  
 Archive: t/hsc07/1  
 File: 1488/vnmrsys/data  
 Sample directory: 1488-135\_2006-08-31  
 File: CARBON\_01  
 Pulse Sequence: s2pu1  
 Solvent: DMSO

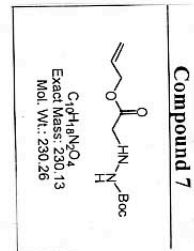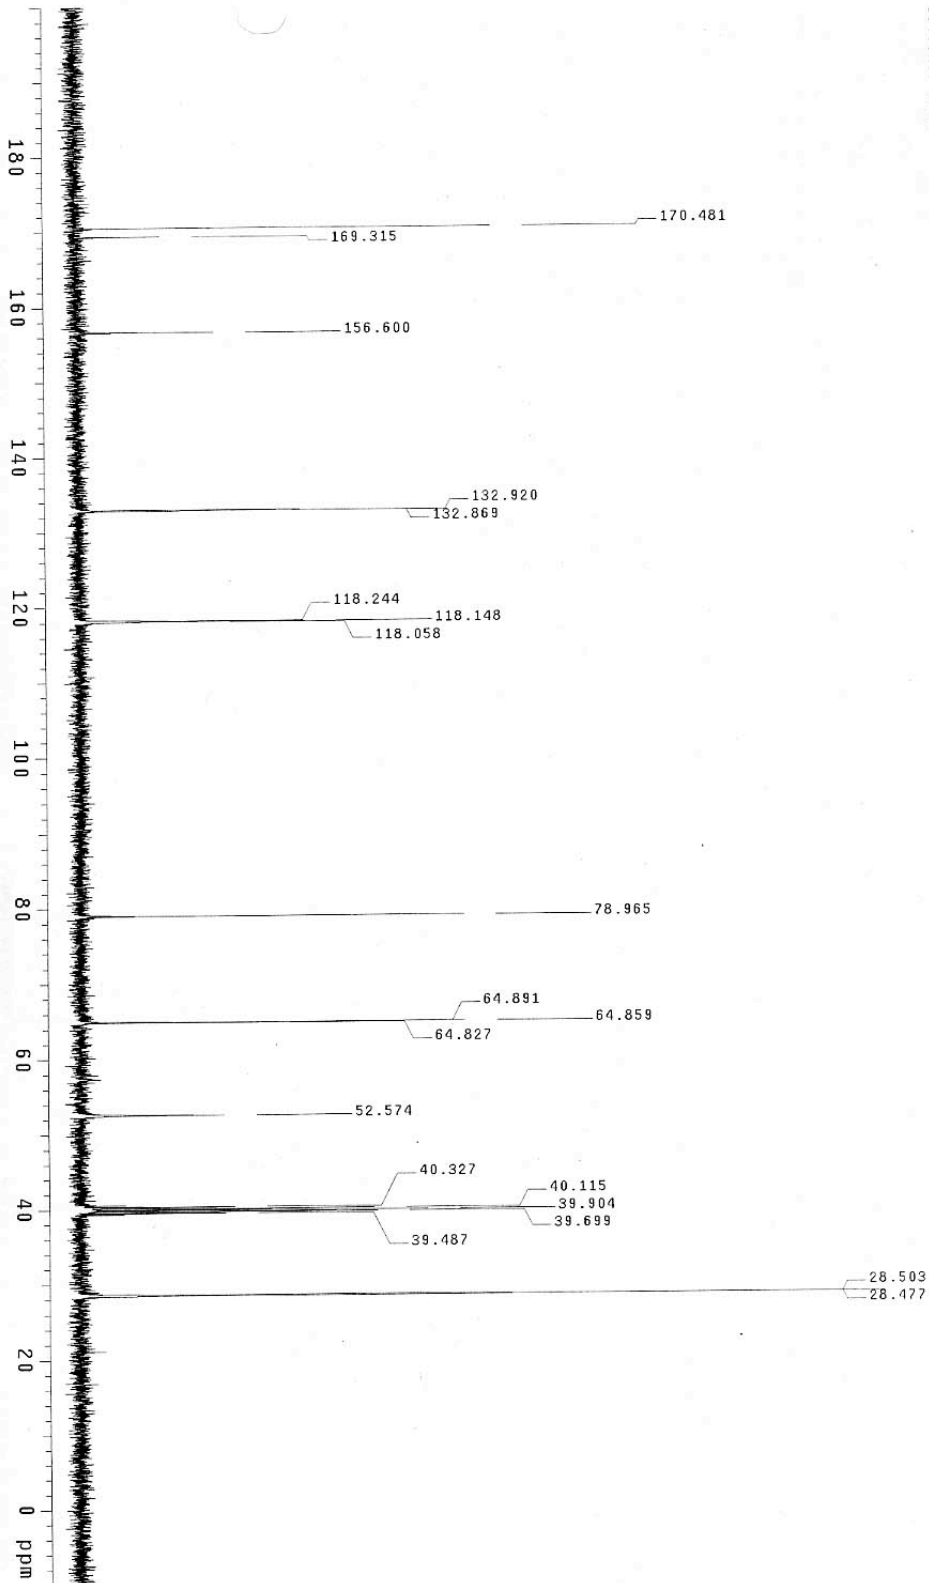

1488-151  
Data Collected on:  
jette2-inova400  
Archive directory:  
/export/home/FL148/vnmr-sys/data  
Sample directory:  
1488-151\_2006-08-02  
File: PROTON\_01  
Pulse Sequence: szpu1  
Solvent: DMSO

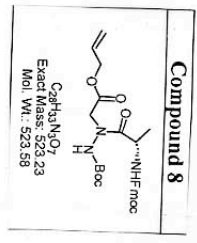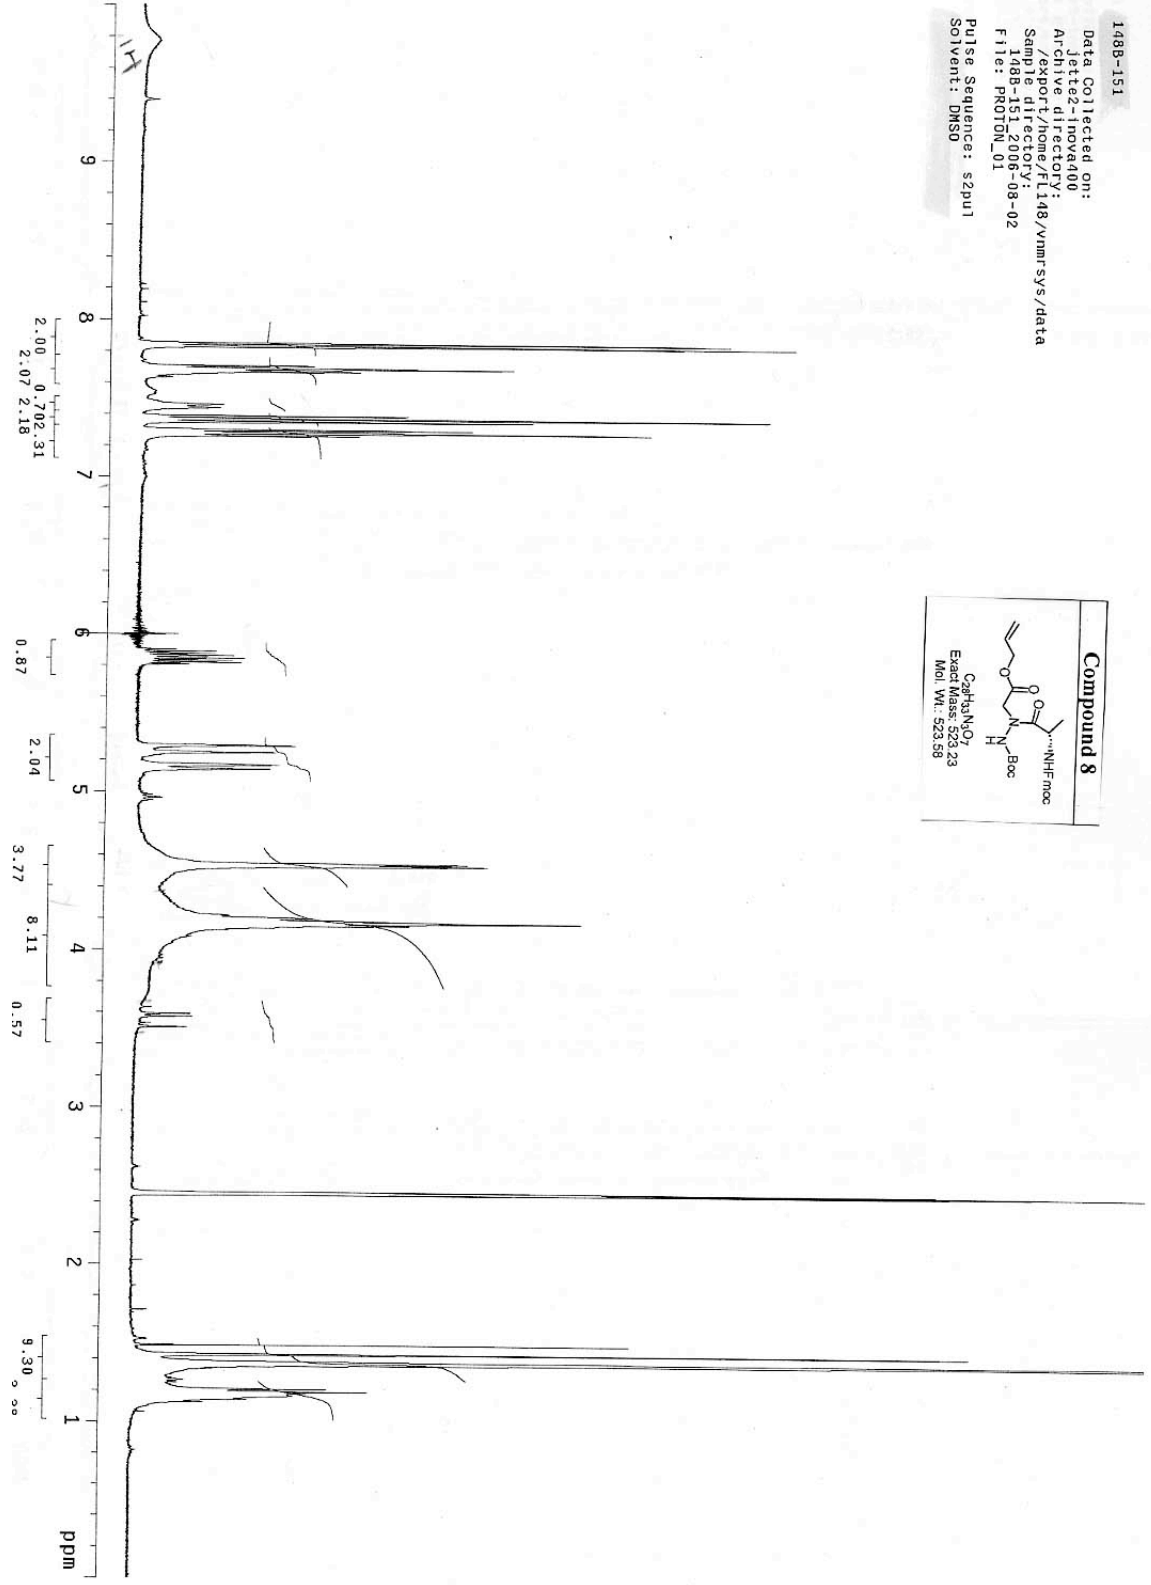

1488-151

Date Collected on: Jetter-11nov00  
Acq. time: 1.199 sec  
Sample directory: 1488-151\_2006-09-01  
File: CARBOM\_01  
Pulse Sequence: s2pul  
Solvent: DMSO  
Temp: 25.0 C / 298.1 K  
Operator: TL10  
Relax. delay 1.000 sec  
Pulse 45.0 degrees  
Acq. time 1.199 sec  
Width 21108.2 Hz  
0.82 repeats tone  
0.82 SFO 0.0 Hz  
DECUPLE HI 399.7421828 MHz  
Power 36 db  
continously on  
MALTZ-16 modulated  
DATA PROCESSING  
Line broadening 1.0 Hz  
F2 200.1312000 MHz  
Total time 18 min

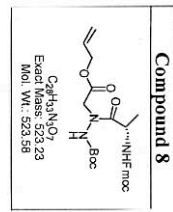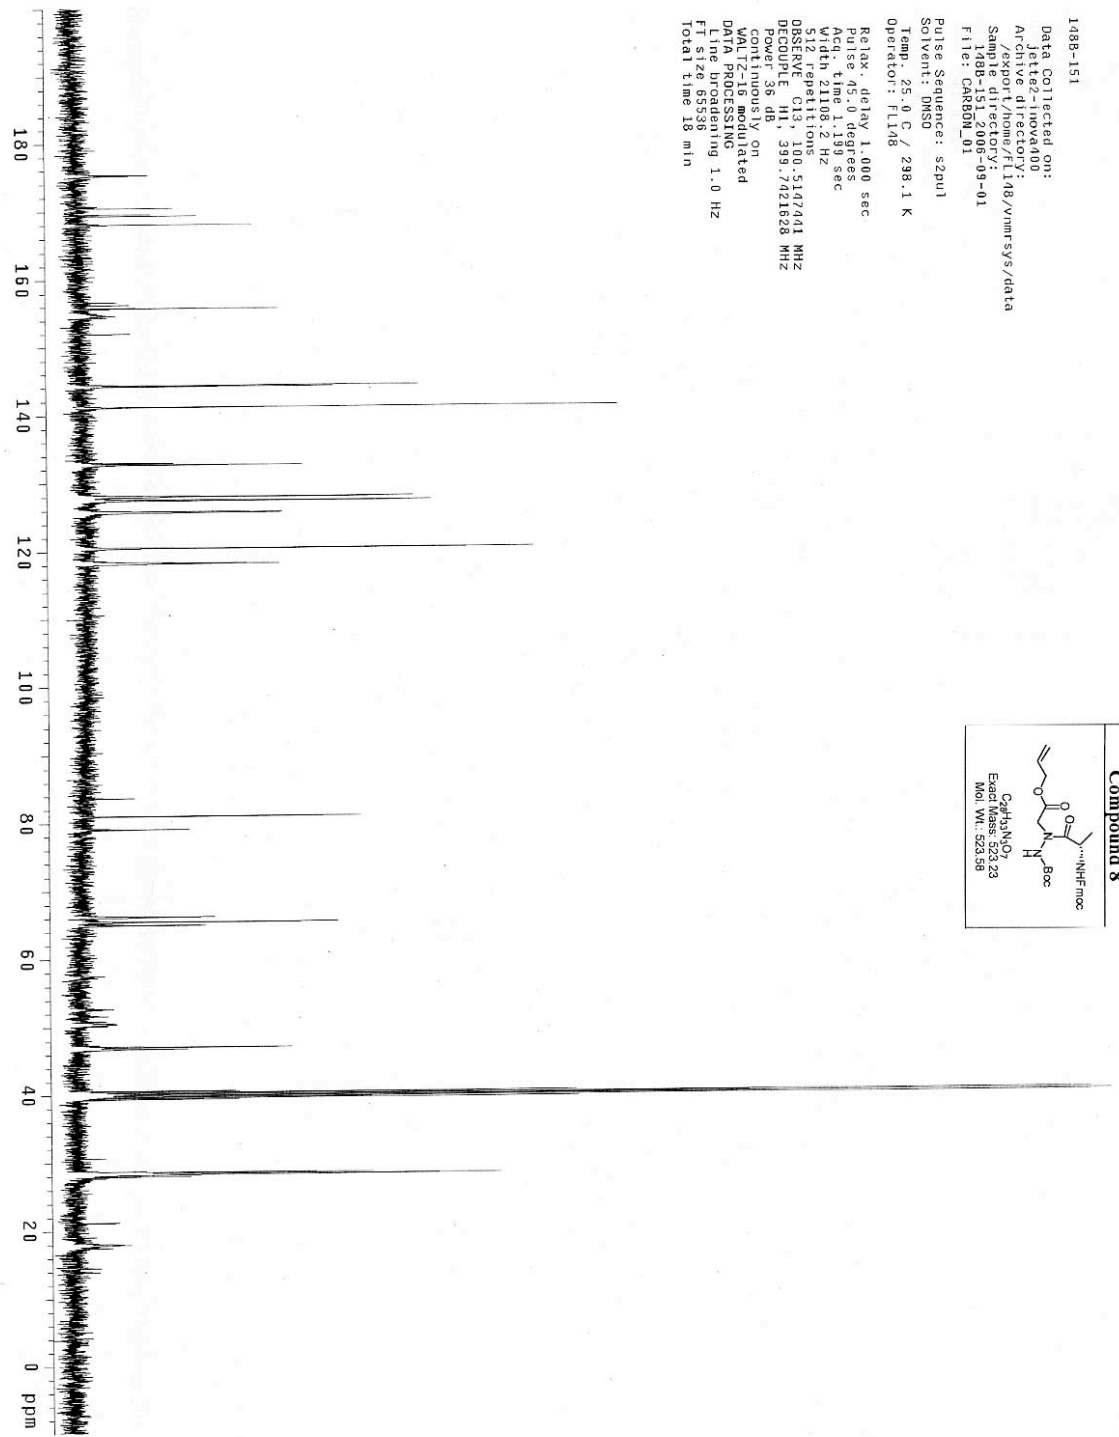





148B-153

Data Collected on:  
Jetted-inova400  
Archive directory:  
/export/home/fl148/vmrsys/data  
Sample: 453  
File: CARBON\_01

Pulse Sequence: szpu1  
Solvent: DMSO

Temp: 25.0 C / 298.1 K  
Operator: FL148

Relax: delay 2.000 sec  
Pulse 45.0 degrees  
Acq. time 1.199 sec  
Ald. time 0.292 sec  
512 repeats  
OBSERVE C13 100.5147441 MHz  
DECUPLE H1 399.7421628 MHz  
Power 38 dB  
Continuously on  
WALTZ-16 modulated  
DATA PROCESSING  
Line broadening 1.0 Hz  
F2 size 65536  
Total time 27 min

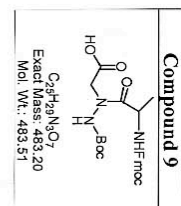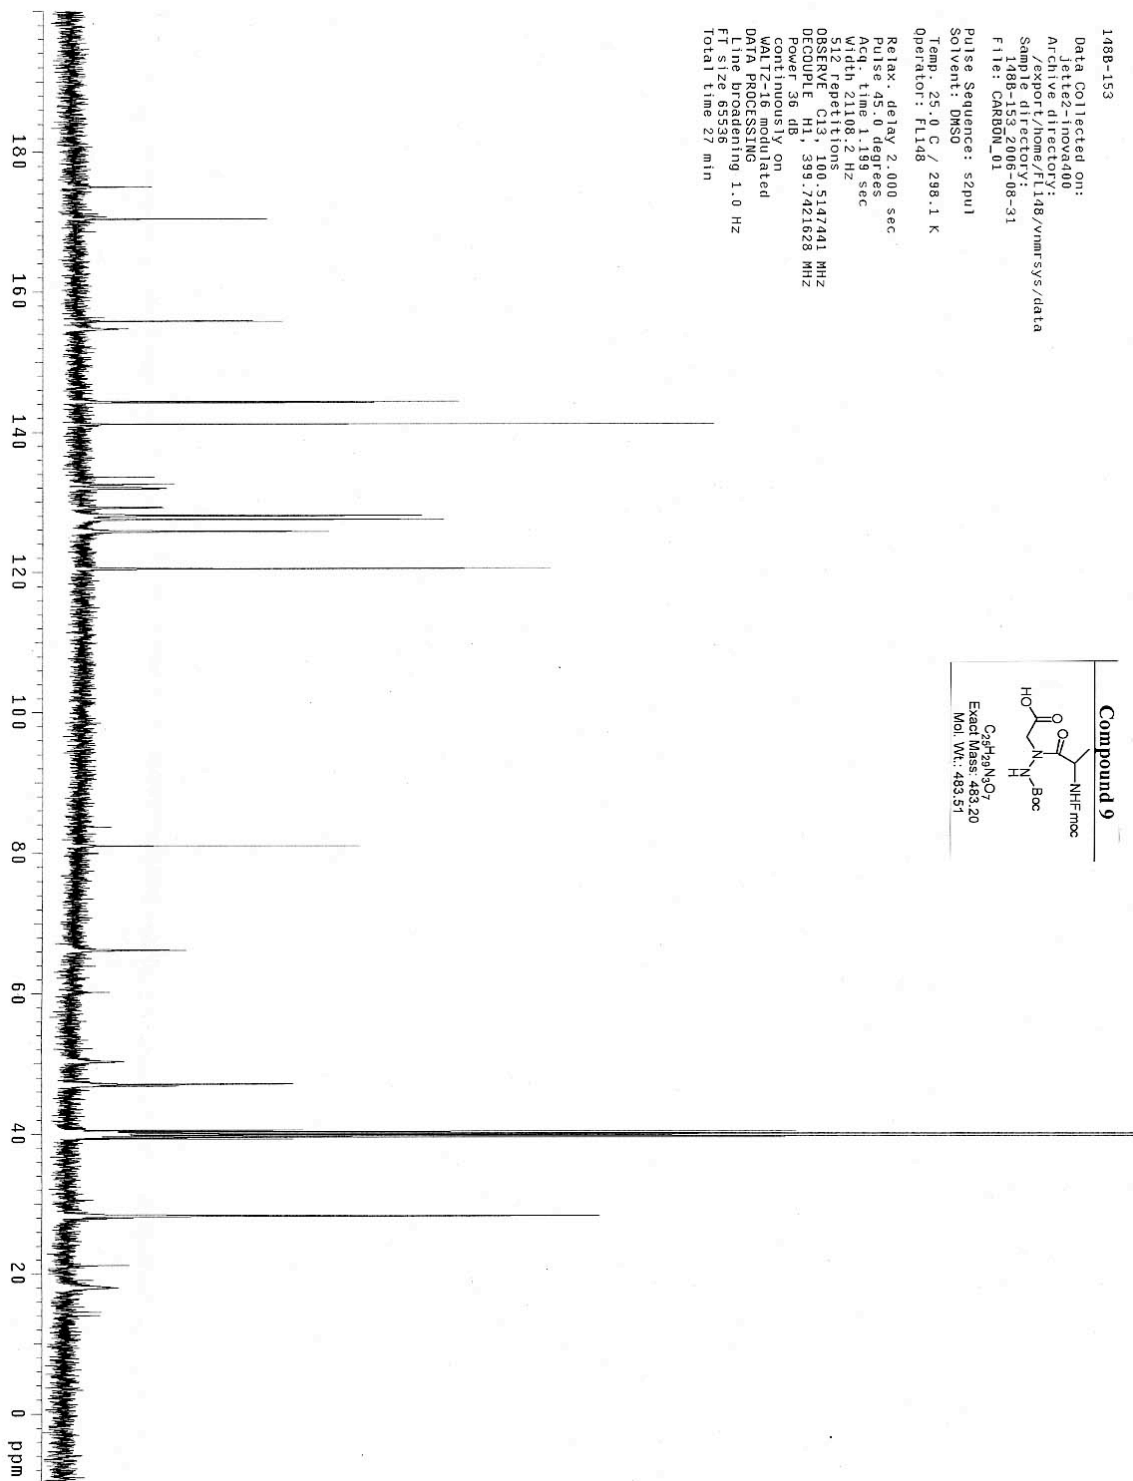

148C-122-1  
Data Collected on:  
Jetter-inova400  
Archive directory:  
/export/home/FL148/vnmr-sys/data  
Sample directory:  
148C-122-1-2006-06-26  
File: PR010M\_01  
Pulse Sequence: szpu1  
Solvent: CDCl3

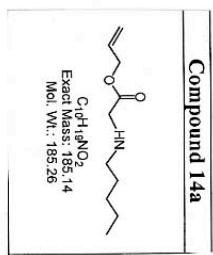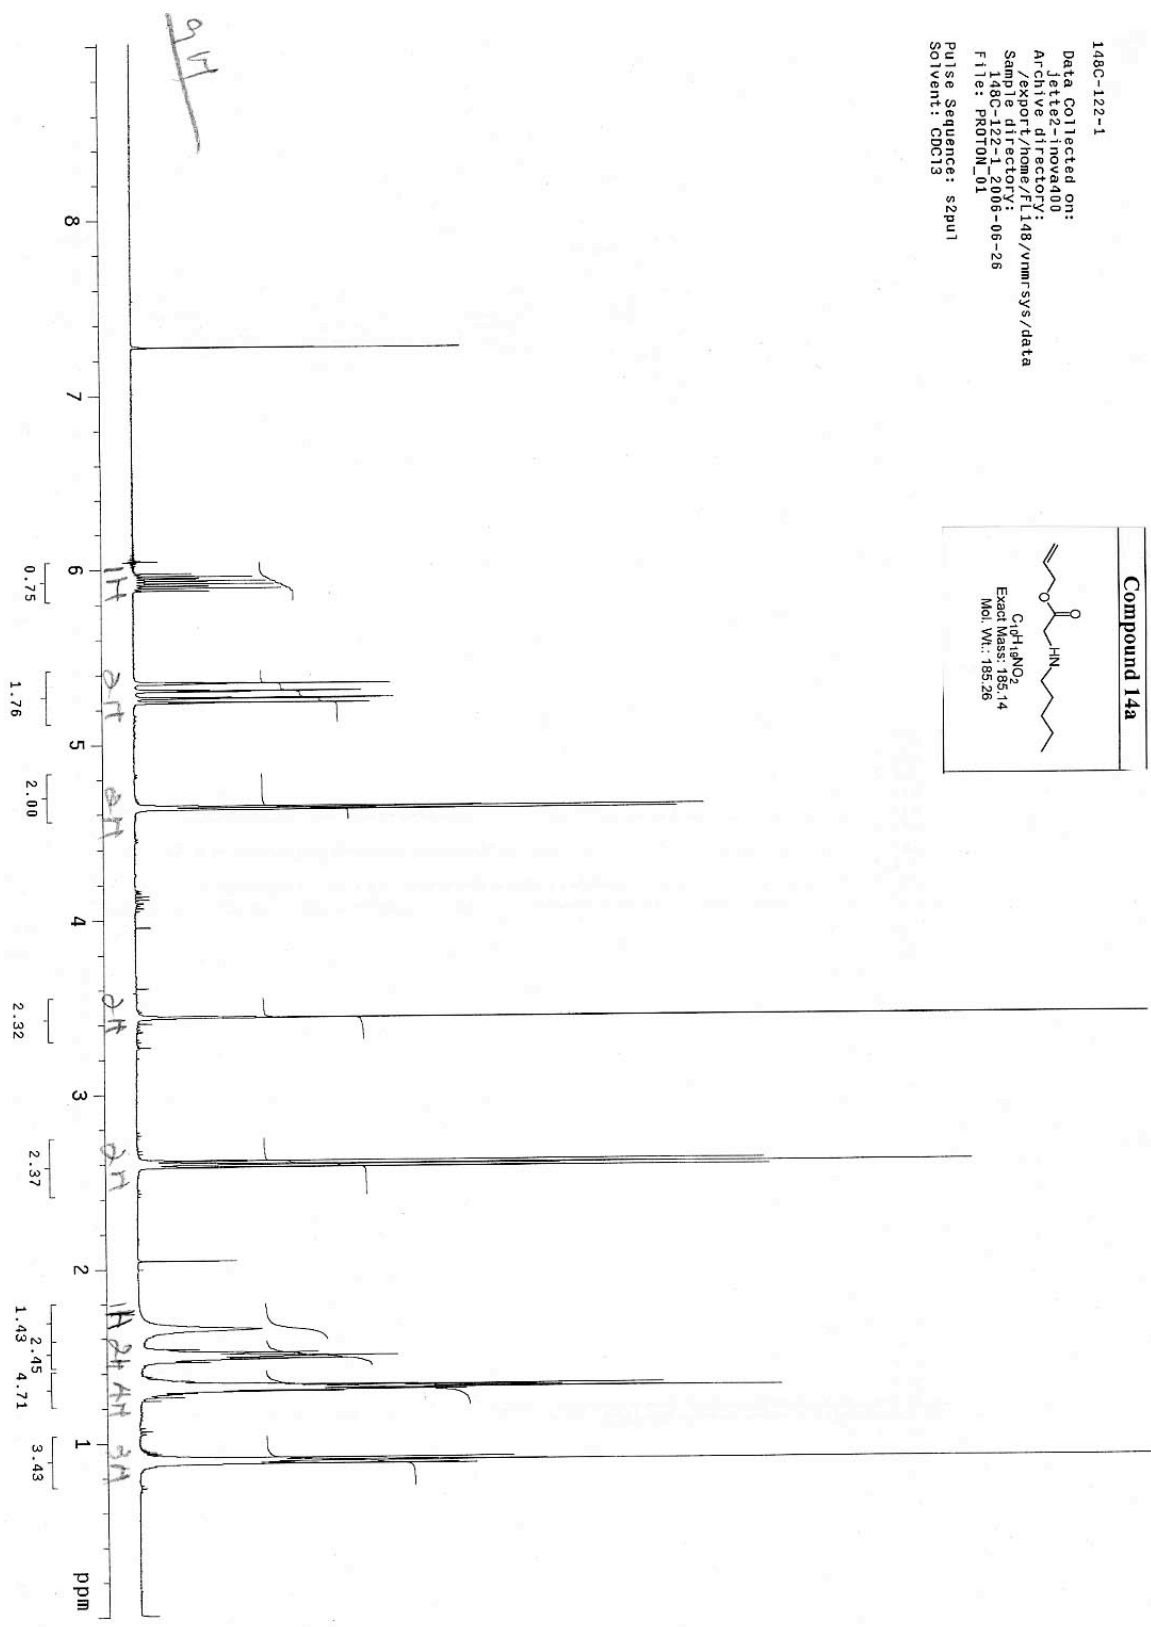

148C-127-2 (122-1)  
Data Collected on:  
Jetta2-inova400  
Archive directory:  
/export/home/FL148/vmmr/sys/data  
Sample directory: 09-01  
148C-127-2-2008-09-01  
File: CARBON\_01  
Pulse Sequence: szpu1  
Solvent: DMSO

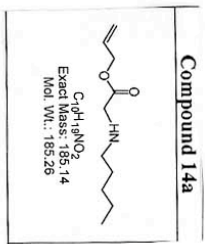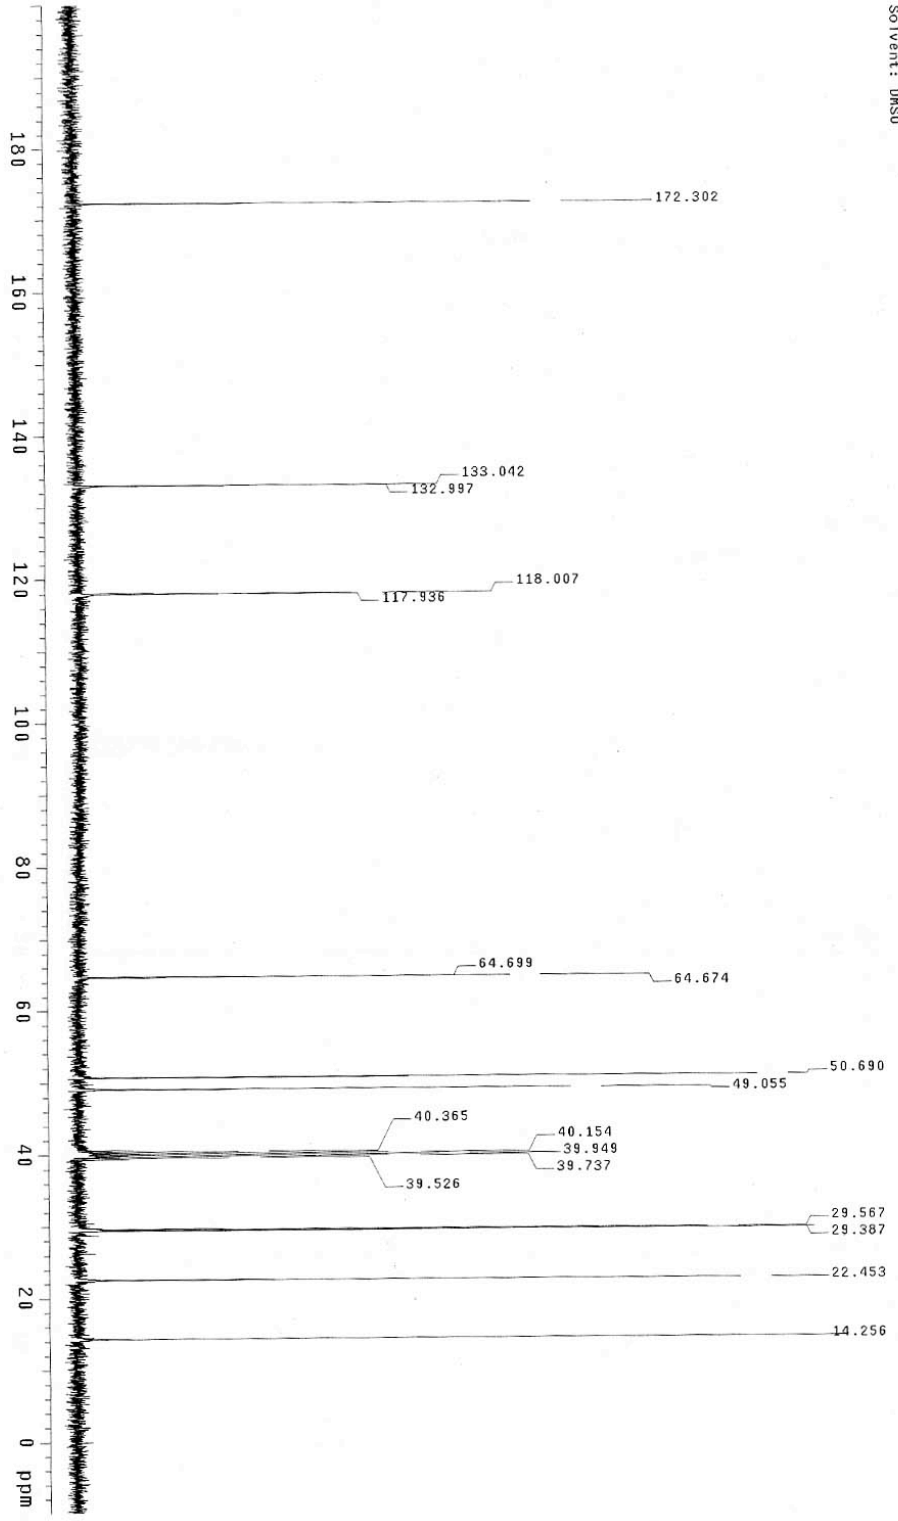

148C-122-2  
Data Collected on:  
Jetted-inova400  
Archive directory:  
/export/home/FL148/vnmr/sys/data  
Sample directory:  
148C-122-2-008-06-22  
File: PR01M\_01  
Pulse Sequence: szpu1  
Solvent: CDCl3

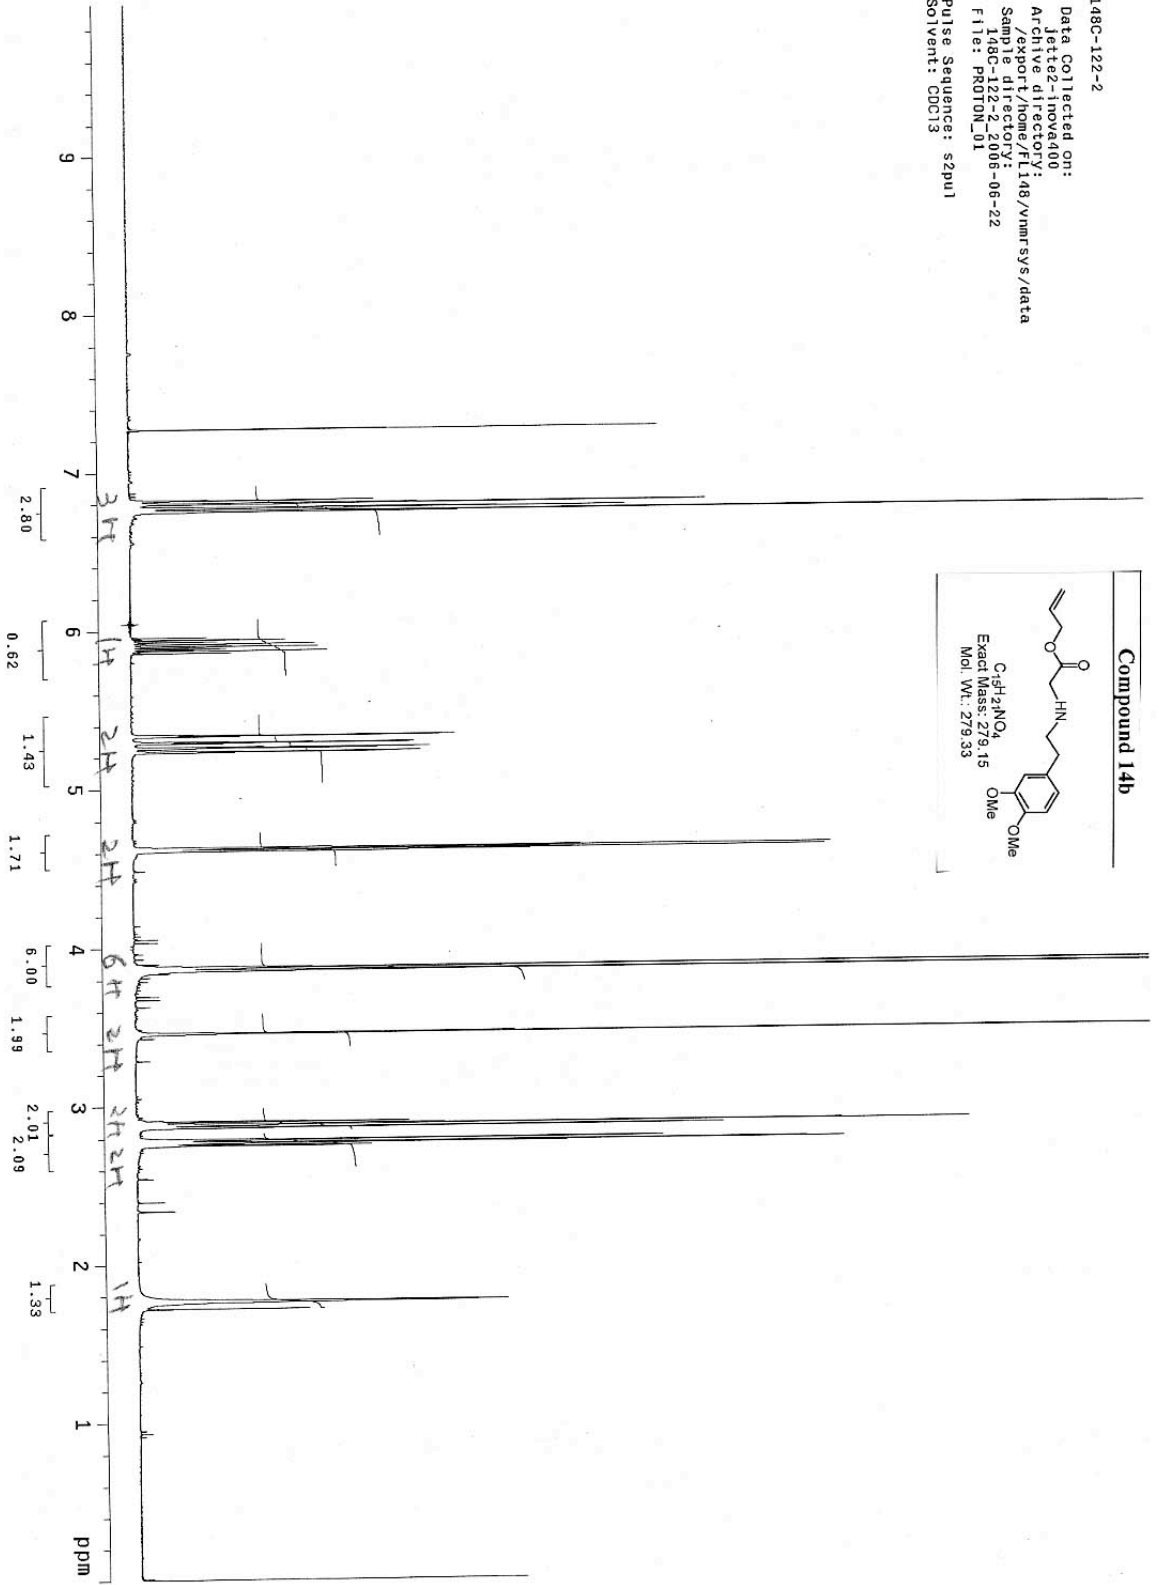

148C-122-2  
Data Collected on:  
Jetfez-inova400  
Archive directory:  
/export/home/FL148/vmmr/sys/data  
Sample: 115.eco01  
File: CARSON\_01  
Pulse Sequence: szpu1  
Solvent: DMSO

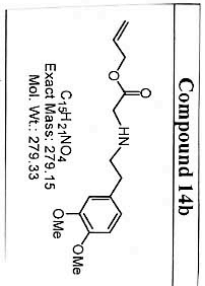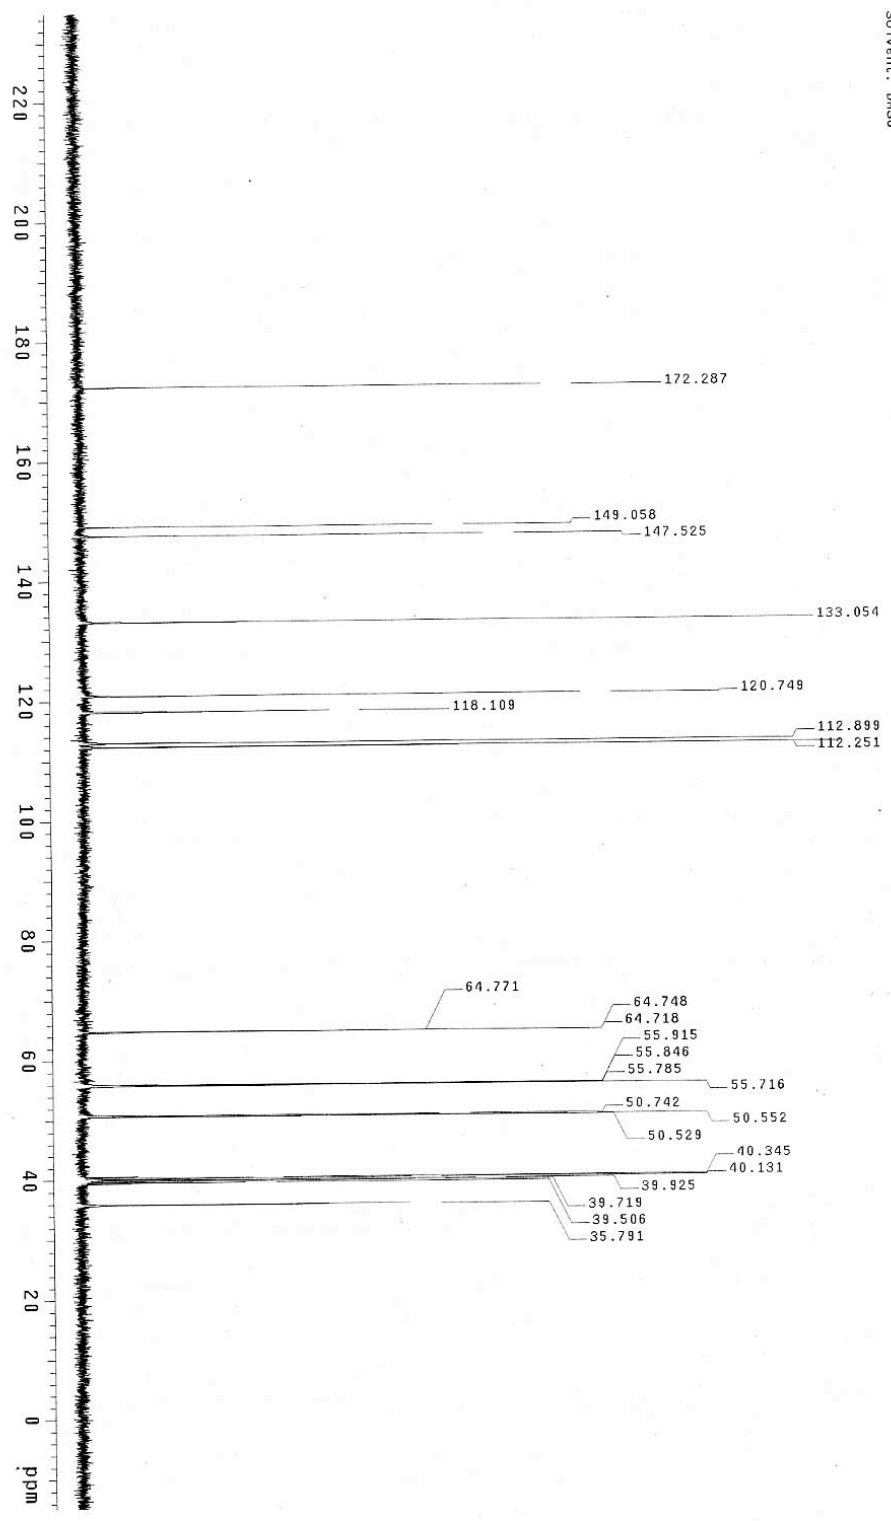

148C-127-2  
⑤ 127-1

Data Collected on:  
Jetted-inova400  
Archive directory:  
/export/home/FL148/vnmrsys/data  
Sample directory:  
148-127-1-008-08-02  
File: PR070M\_01  
Pulse Sequence: szpu  
Solvent: DMSO

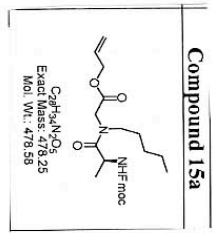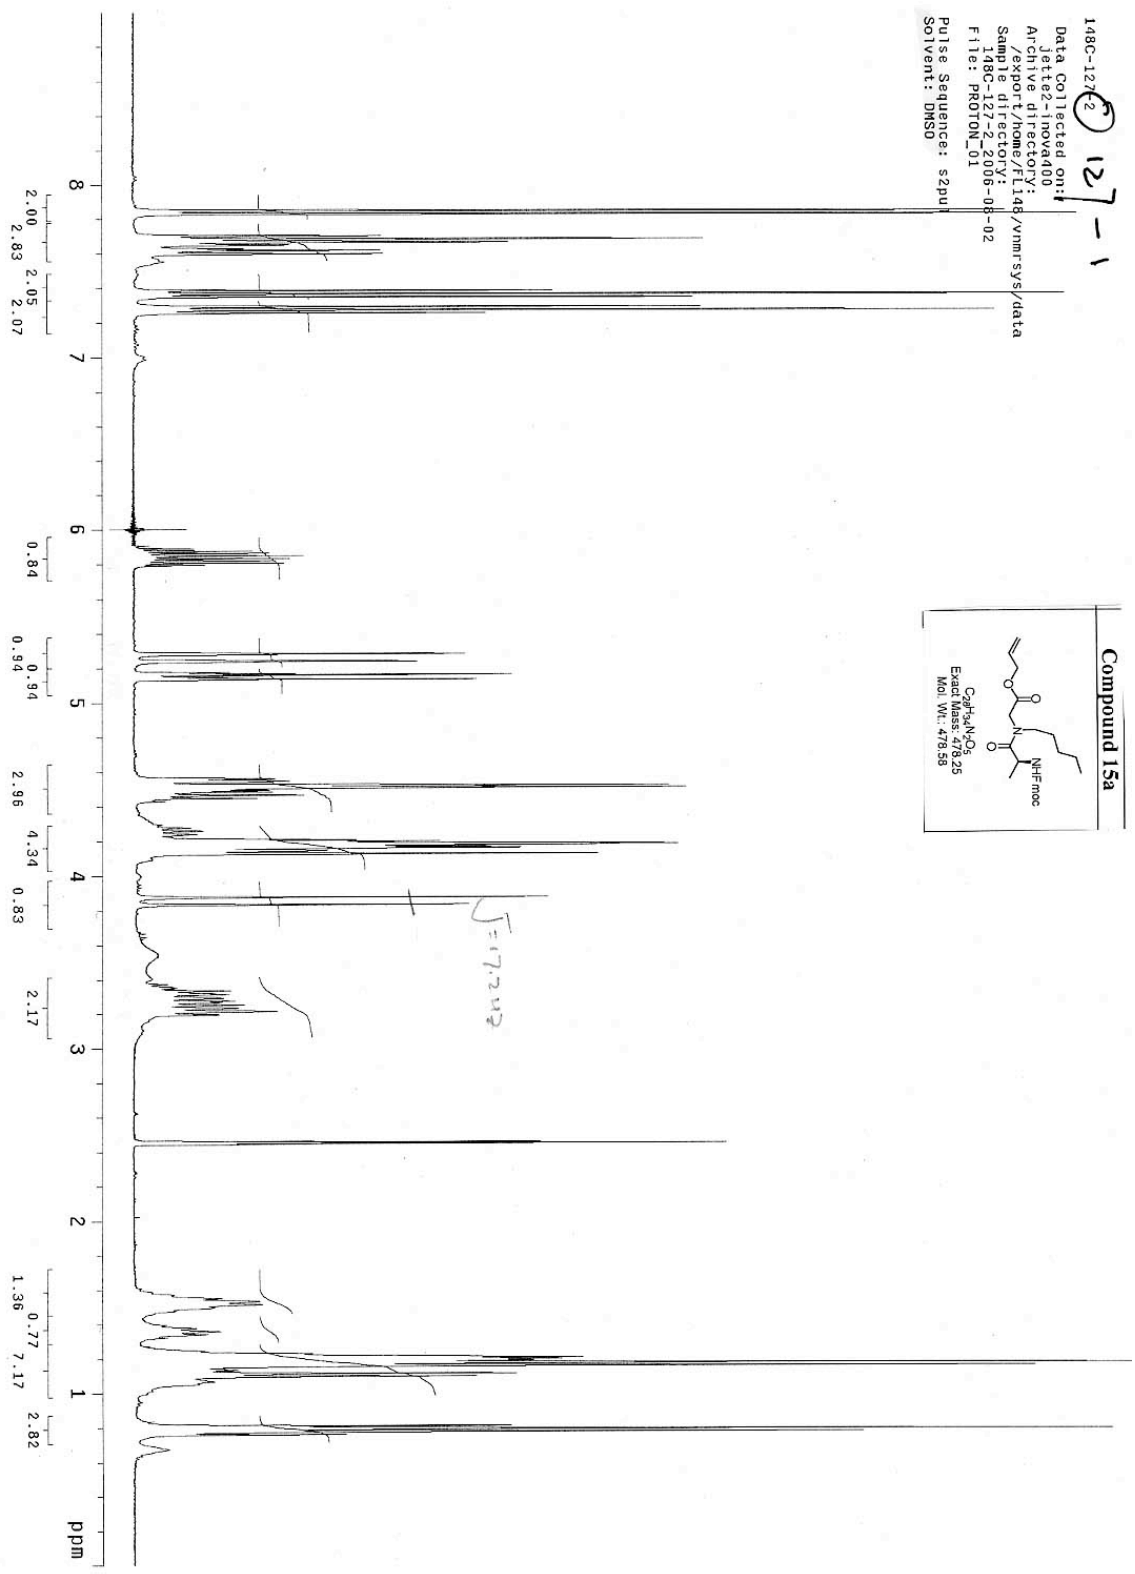

148C-12-1

Data Collected on:  
Jetted2-inovad00  
Active directory: /48/vmmrsvs/data  
Sample directory:  
148C-12-1-2006-09-01  
File: CARBON\_01  
Pulse Sequence: szpu1  
Solvent: DMSO  
Temp: 25.0 C / 298.1 K  
Operator: FL148  
Relax. delay: 1.000 sec  
Pulse: 45.0 degrees  
Acq. time: 1.199 sec  
Width: 21108.2 Hz  
384 repetitions  
OBSERVE C13, 100.5147441 MHz  
DECOUPLE 6, 399.7421028 MHz  
CONTINUOUSLY on  
WALTZ-16 modulated  
DATA PROCESSING  
Line broadening 1.0 Hz  
FT size 65536  
Total time 18 min

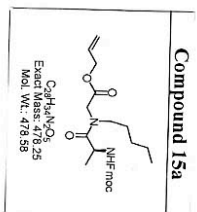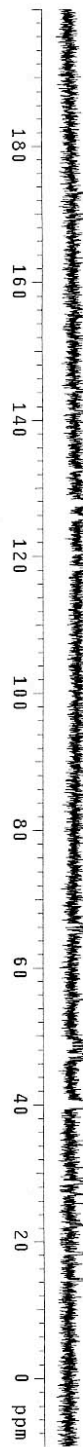



148C-127-2  
 Data Collected on:  
 Jette2-10pva400  
 Archive directory:  
 /export/home/FL148/vmrsys/data  
 Sample directory:  
 148C-127-1\_2006-06-26  
 File: PROTON\_01  
 Pulse Sequence: szpul  
 Solvent: CDCl3

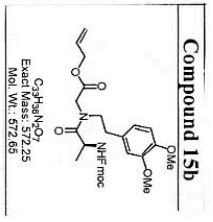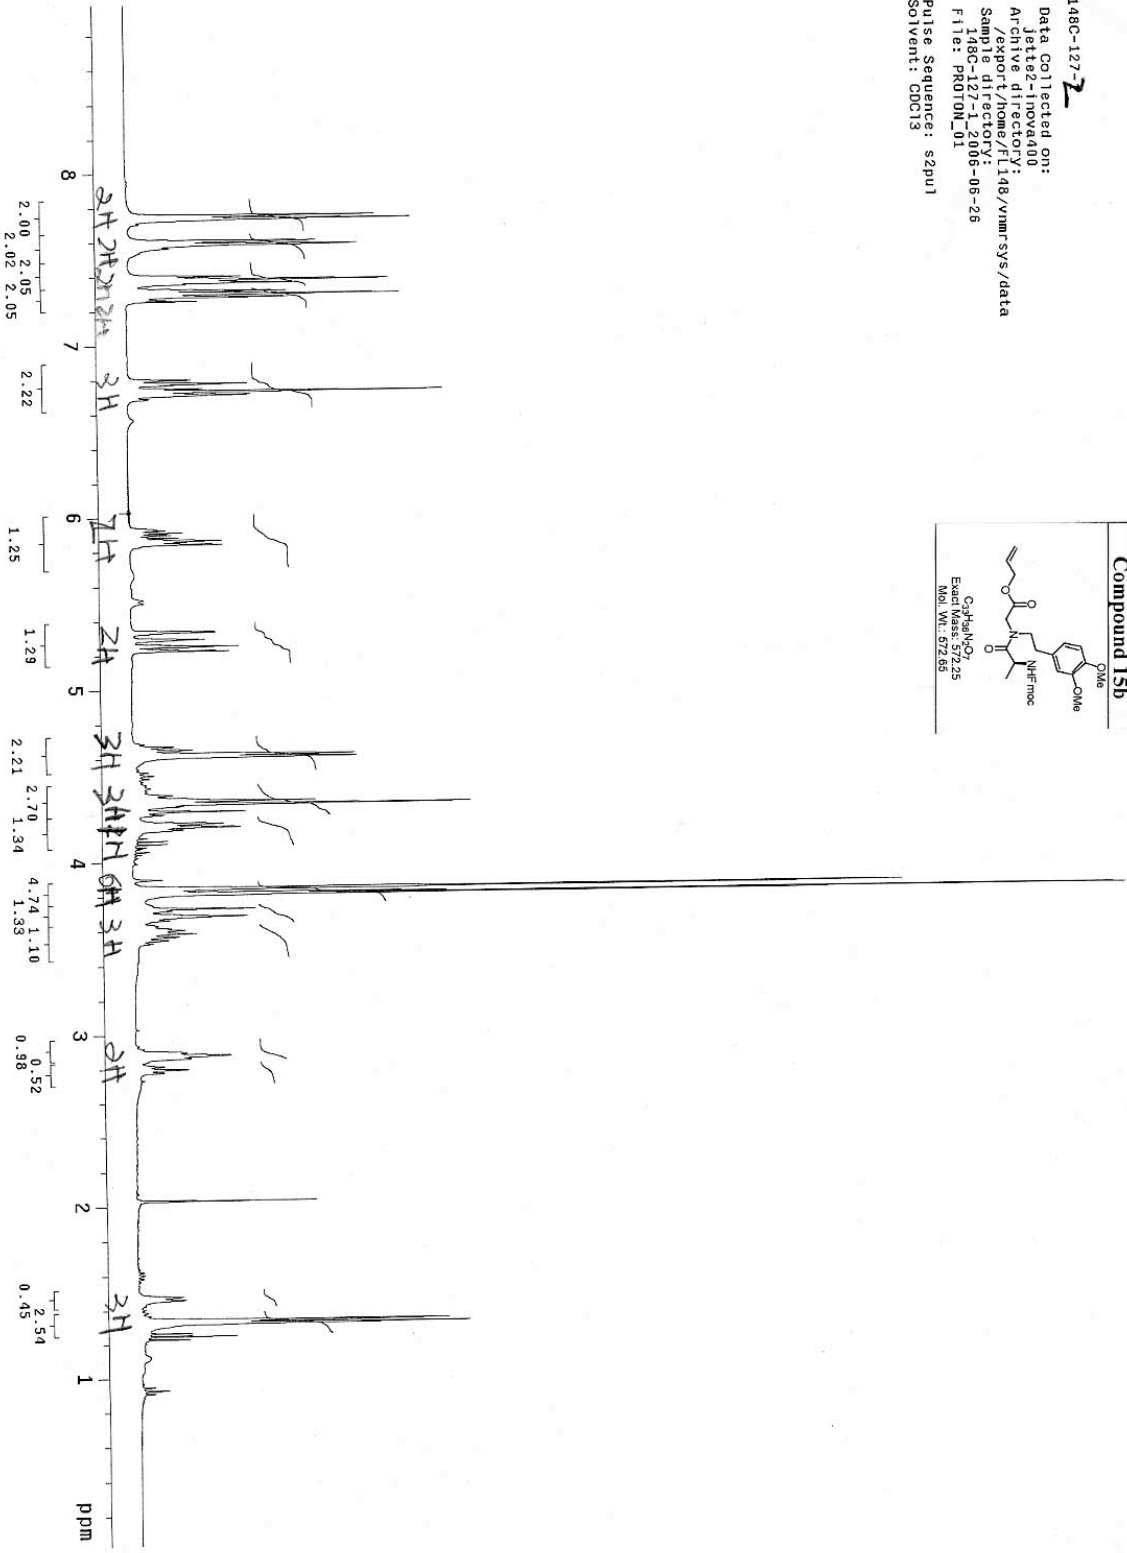

148C-129-1  
 Data Collected on:  
 Jetze-Inovard00  
 Active Directory: \\188.vnmr.sys\data  
 Sample directory:  
 148C-129-1.2006-08-02  
 File: PROTON\_01  
 Pulse Sequence: szpu1  
 Solvent: DMSO

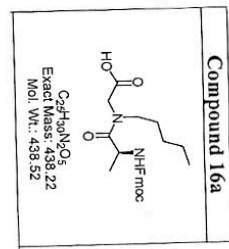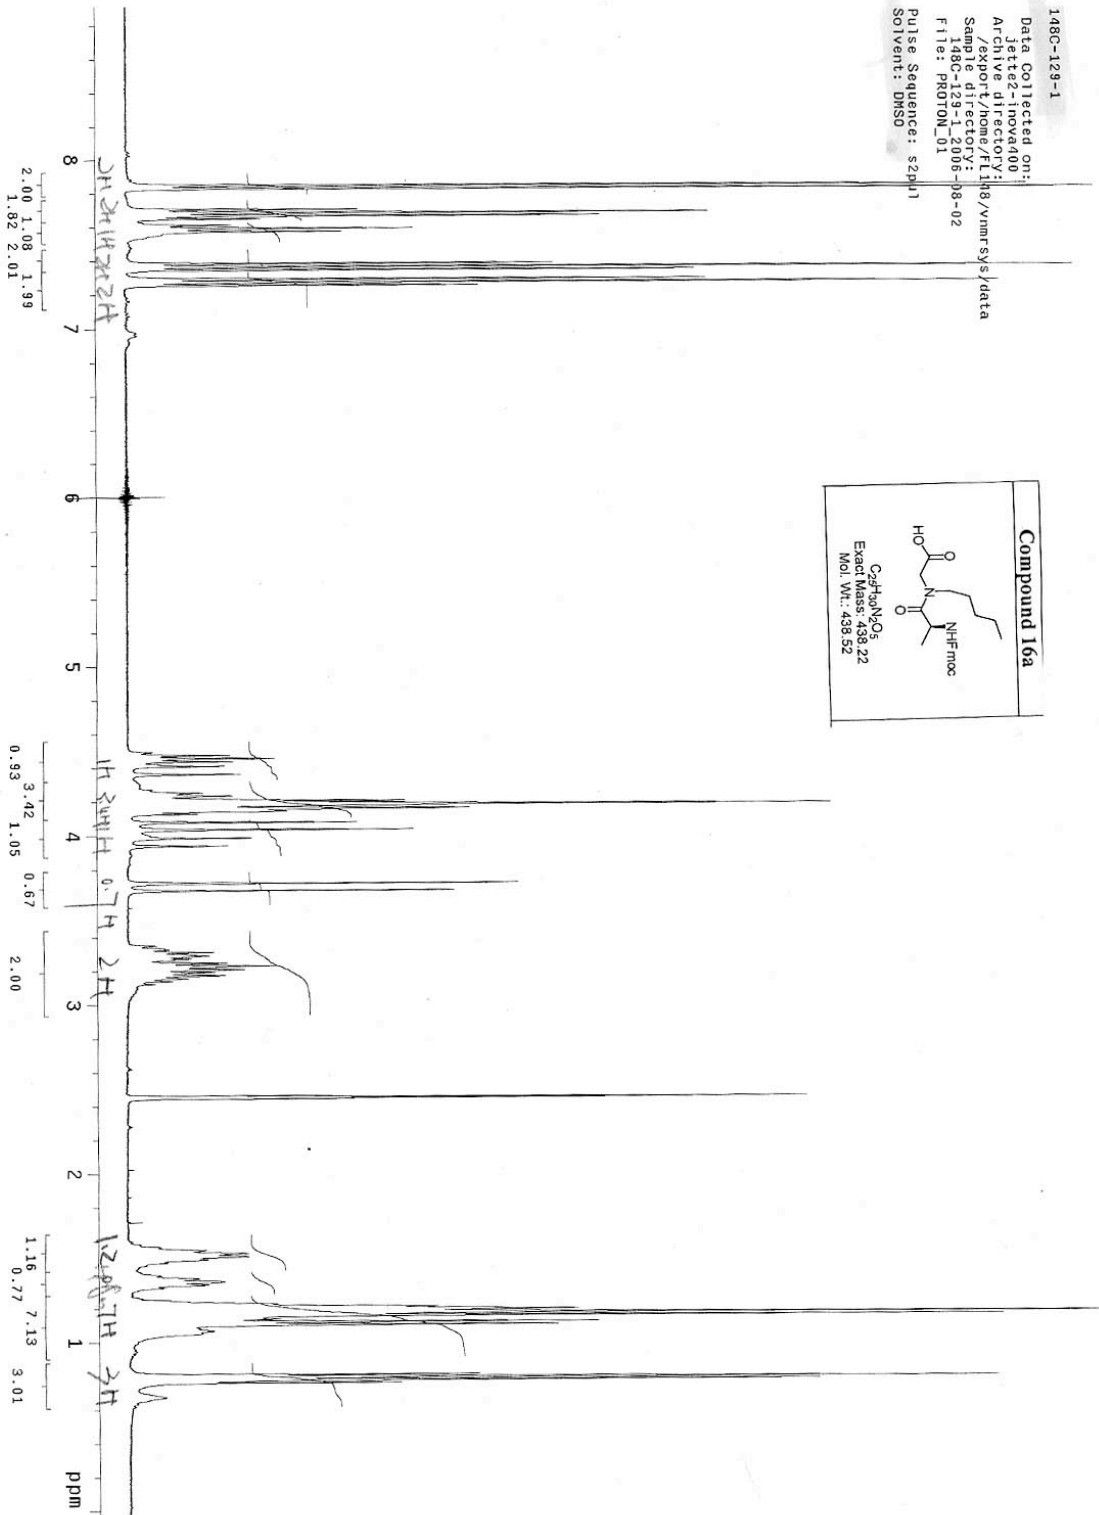

148C-129-1

Data Collected on:  
jetter2-inoxv4d0  
Archive directory:  
/export/home/FL148/vnmr/sys/data  
Sample directory:  
148C-129-1-2006-08-31  
File: GMR0M\_01  
Pulse Sequence: s2pul  
Solvent: DMSO  
Temp: 25.0 C / 298.1 K  
Operator: FL148

Relax: delay 1.000 sec  
Pulse: 45.0 deg/sec  
Acq: 45.0 deg/sec  
Width 2108.2 Hz  
Siz: 128  
SIZ: 128  
OBSERVE: C13, 100.5147441 MHz  
DECOUPLE: H1, 399.7421628 MHz  
Power: 36.00 dB  
Waltz: 216 modulated  
DATA PROCESSING  
Line broadening 1.0 Hz  
F1 size 65536  
Total time 18 min

Compound 16a

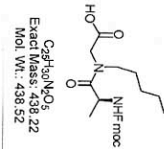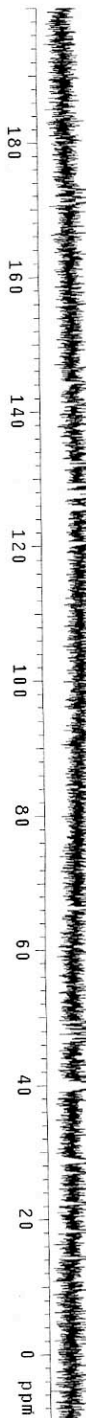



148C-129-2

Data collected on:  
Date: 11/06/00  
Archive directory:  
/export/home/FL148/vnmr-sys/data  
Sample directory:  
148C-129-2-2006-08-31  
File: CARBON\_01  
Pulse Sequence: s2pul  
Solvent: DMSO  
Temp: 25.0 C / 298.1 K  
Operator: FL148  
Relax. delay 1.000 sec  
Pulse: 45.0 degrees  
Acq. time 1.189 sec  
Width 25125.6 Hz  
Sweep rate 0.5147441 MHz  
QSDRV0 0.3997421928 MHz  
DECOUPLE H1 -399.7421928 MHz  
Power 36 db  
Continuously on  
WALTZ-16 modulated  
DATA PROCESSING  
Line broadening 1.0 Hz  
FT size 65536  
Total time 18 min

Compound 16b

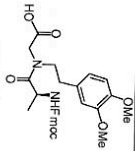

QSDRV0  
Exp'd Mass 325.22  
Mol. Wt. 325.36

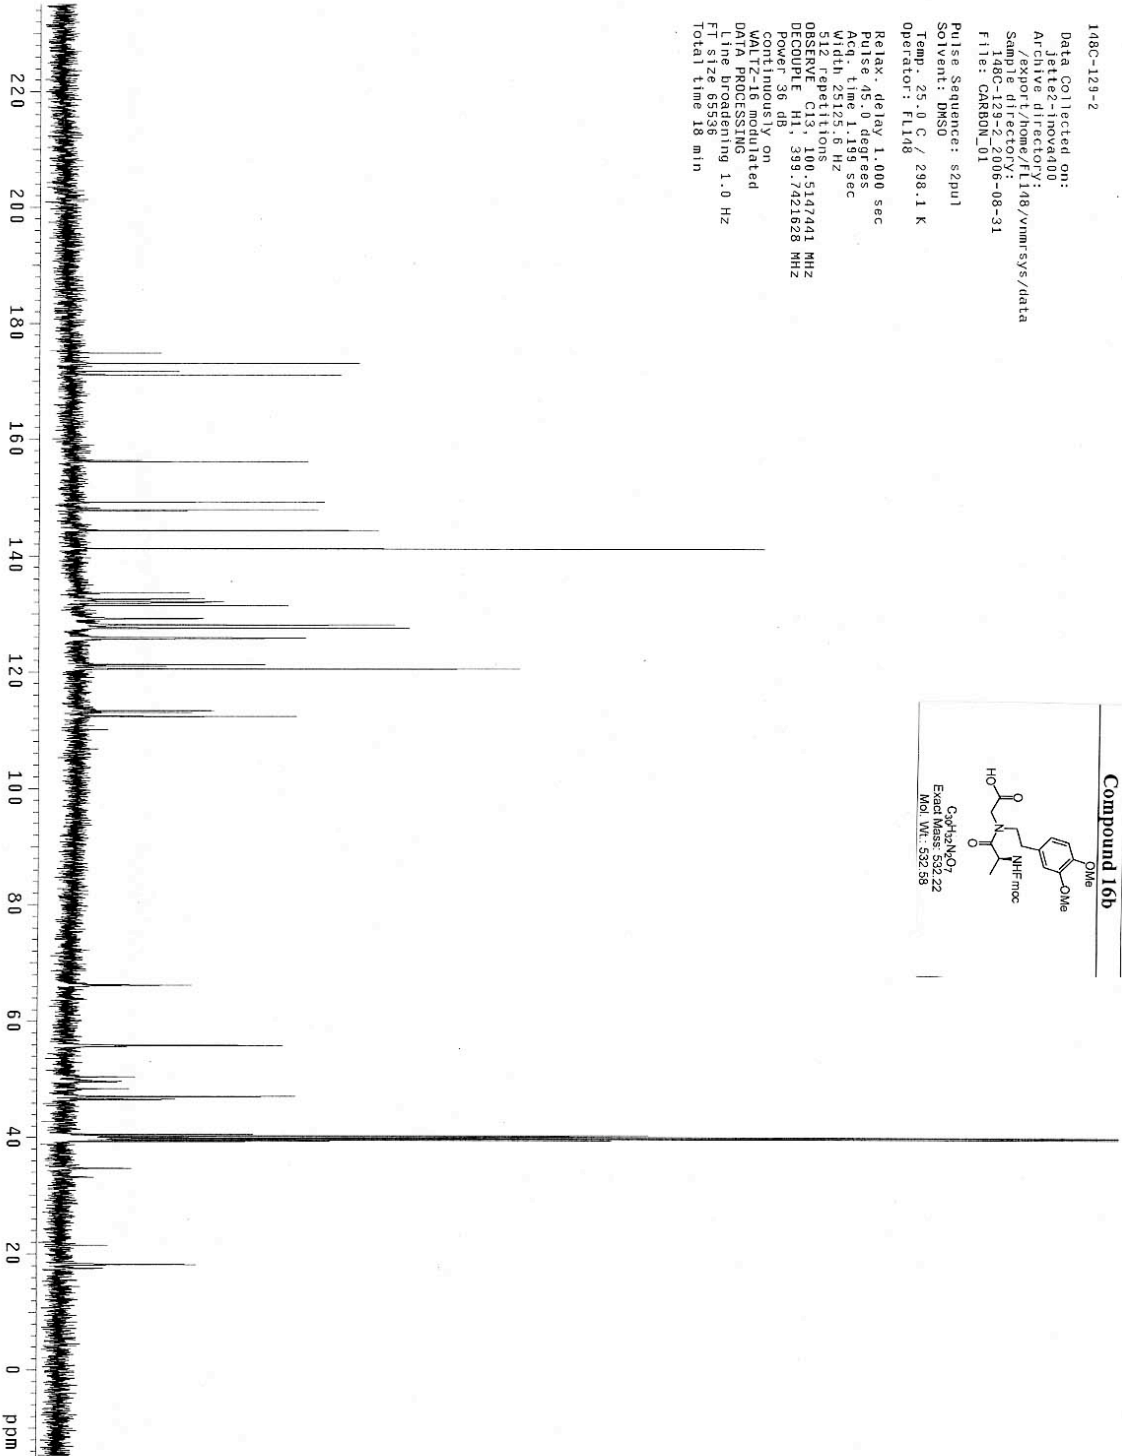

Supplement: NIHMS64886-supplement-1si20060921_01.pdf [file NIHMS64886-supplement-1si20060921_01.pdf]
